1 ***Iba1+* Microglia Colocalize with *Synaptophysin+* and *Homer1+* Puncta**  
2 **and Reveal Two Novel Sub-types of GABAergic Neuron in Guinea Pig**  
3 **Inferior Colliculus**

4 **Author names and affiliations**

5 Samuel David Webb\* and Llwyd David Orton\*#

6 \* School of Healthcare Science, Manchester Metropolitan University, Manchester, M1 5GD

7 # Institute of Neuroscience, Newcastle University, Newcastle upon Tyne, NE2 4HH, UK

8 **Corresponding and submitting author**

9 Llwyd Orton

10 [l.orton@mmu.ac.uk](mailto:l.orton@mmu.ac.uk)

11 +44 161 247 2483

12 School of Healthcare Science, Manchester Metropolitan University, Manchester, M1 5GD

13 **Contributions (CRediT)**

14 SW: Formal analysis, Investigation, Methodology, Validation, Visualization, Writing – original  
15 draft, review and editing.

16 LDO: Conceptualization, Data curation, Formal analysis, Funding acquisition, Methodology,  
17 Project administration, Resources, Supervision, Validation, Visualization, Writing – original  
18 draft, review and editing.

19 **Conflict of interest**

20 The authors declare no competing financial interests.

21 **Acknowledgements**

22 We thank Adrian Rees for generous donation of tissues and Claudia Racca for comments on  
23 an earlier version of the manuscript.

## 24 **Abstract**

25 Microglia have classically been viewed as the endogenous phagocytes of the brain, however,  
26 emerging evidence suggests roles for microglia in the healthy, mature nervous system. We  
27 know little of the contribution microglia make to ongoing processing in sensory systems. To  
28 explore *Iba1+* microglial structural and synaptic diversity, we employed the inferior colliculi as  
29 model nuclei, as they are characterized by sub-regions specialized for differing aspects of  
30 auditory processing. We discovered extensive *Iba1+* ramifications interacting with *homer1+*  
31 and *synaptophysin+* puncta (putative synapses) throughout the parenchyma. There was a  
32 greater density of these puncta in dorsal cortex, a sub-region specialized for mediating top-  
33 down corticofugal plasticity, than other sub-regions more specialized for processing  
34 ascending auditory or polymodal information. Cluster analyses revealed two novel sub-types  
35 of *GAD67+* neurons which can be distinguished solely based on the quantity of axo-somatic  
36 *Iba1+* contacts they receive. These data demonstrate *Iba1+* microglia exhibit specialized  
37 synaptic and cellular adaptations to ongoing processing in the mature, healthy auditory  
38 system. These specializations appear to relate to the afferent drive, plastic nature and  
39 inhibitory basis of local processing. Taken together, these findings suggest significant  
40 heterogeneity amongst microglia in sensory systems, related to the functional demands of  
41 their spatial niche.

## 42 **Introduction**

43 Inhibition is an essential element of neural processing and a defining component of sensory  
44 systems. GABAergic inhibition is prevalent in the auditory system, particularly in the principal  
45 auditory midbrain nuclei, the inferior colliculi (IC). Around a quarter of neurons in IC are  
46 GABAergic (Merchán et al., 2005), which may be why the IC is the most metabolically active  
47 nucleus in the mammalian brain (Sokoloff et al., 1977). Understanding how inhibitory cell types  
48 vary in different brain regions, to specialize for distinct functions, is a key area of neuroscientific  
49 study (Freund and Buzsáki, 1996; Tremblay et al., 2016). Most investigations into sub-types of  
50 inhibitory neurons naturally focus on the cells *per se*, including their morphology,  
51 electrophysiological firing characteristics, expression of cytoplasmic calcium binding proteins  
52 and peptides and RNA transcriptome. Another approach is to characterize and classify  
53 GABAergic neurons based on differences in the afferent axo-somatic inputs they receive (Ito  
54 et al., 2009; Beebe et al., 2016).

55 The IC has a tonotopic topography that can be divided into sub-regions. The central nucleus  
56 (CNIC) is dominated by neurons sharply tuned to simple auditory stimuli. The dorsal cortex  
57 (DCIC) has much broader frequency tuning and receives extensive corticofugal input and is  
58 specialized for synaptic plasticity (Herbert et al., 1991; Winer et al., 1998; Bajo and Moore, 2005;  
59 Bajo et al., 2010). The other major sub-region is the lateral cortex (LCIC) which exhibits  
60 polysensory tuning (Aitkin et al., 1978). These sub-regions are analogous to the core, belt and  
61 para-belt sub-regions found throughout the auditory pathway (Kaas and Hackett, 1999).  
62 Despite the essential role of the IC in hearing, little is known of how glial cells contribute to  
63 processing therein.

64 In addition to their neuroprotective and phagocytic functions, microglia contribute to ongoing  
65 synaptic function by removing unwanted structures in a process termed 'synaptic stripping'  
66 (Trapp et al., 2007). Furthermore, microglia interact with neurons during 'normal' processing  
67 and can sense and respond to local chemical signaling (Pocock and Kettenmann, 2007; Wake  
68 et al., 2009; Schafer et al., 2012). Certainly there is evidence for an active microglial influence  
69 on synaptic plasticity (Zhang et al., 2014; Riazi et al., 2015), but the nature of this role remains  
70 poorly understood.

71 Here, we take advantage of the functional organization of IC sub-nuclei to interrogate the  
72 anatomical inter-relationships of microglia, astrocytes, *GAD67+* (putative GABAergic) neurons

73 and *homer1+* (putative excitatory) synapses in guinea pig. Employing extensive multi-channel  
74 fluorescence immunohistochemistry and confocal microscopy, we show, for the first time, that  
75 *Iba1+* microglia, but not *GFAP+* astrocytes tile the IC parenchyma. Furthermore, *Iba1+*  
76 processes colocalize with *synaptophysin+* and *homer1+* puncta, demonstrating localization  
77 with putative metabotropic glutamate receptors. These puncta vary between sub-regions with  
78 greater numbers in DCIC, suggesting a role for *Iba1+* microglia in corticofugal plasticity.  
79 Multivariate statistical approaches revealed two novel types of *GAD67+* neuron that can be  
80 perfectly discriminated based on the quantity of *Iba1+* processes abutting their soma. Our  
81 findings open new avenues to explore the fundamental yet under-investigated role microglia  
82 play in ongoing processing in mature nervous systems.

## 83 **Materials and methods**

### 84 Regulation and Ethics

85 All animals were housed and procedures performed in accordance with the terms and  
86 conditions of a license (PPL 60/3934) issued by the UK Home Office under the Animals  
87 (Scientific Procedures) Act 1986. Ethical approval was provided by the Local Ethical Review  
88 committee at Newcastle University and the School of Healthcare Science Ethics Committee at  
89 Manchester Metropolitan University.

### 90 Animals

91 Results are described from four adult (one at four months old, three at six months old) outbred,  
92 tricolor guinea pigs (*Cavia porcellus*) of both sexes (three male, one female). Animal weights  
93 on the morning of each respective perfusion ranged from 675g to 867g. We aimed to minimize  
94 the number of animals used and their suffering at all times.

### 95 Anesthesia and Tissue Processing

96 Animals were deeply anesthetized with sodium pentobarbital (i.p. injection; Euthanal, Merial;  
97 200mg/ml, 2 ml volume). After five minutes, the pedal withdrawal and blink reflexes were  
98 assessed to confirm a deep plane of anesthesia. This was followed by transcardial gravity  
99 perfusion with 500mls of 0.1M heparinized PBS followed by 500mls of freshly made 4%  
100 paraformaldehyde in 0.1M PBS. Both solutions were pH 7.2 directly prior to use.

101 Brains were removed with rongeurs (Micro Friedman, 0.8mm jaws, WPI) and post-fixed in 30%  
102 sucrose in 4% paraformaldehyde, for at least 3 days at 4°C. Once brains sank, they were cut in  
103 the coronal plane with a razor blade through the parietal and temporal lobes, at around the  
104 rostro-caudal location of the medial geniculate. The tissue block was then placed in an  
105 embedding mold (Peel-a-way; Shandon), covered in embedding medium (OCT; Agar Scientific)  
106 and frozen at -80°C. 60µm sections were taken on a cryostat (HM560, Microm) and collected  
107 in 12 well plates in cryoprotectant (30% sucrose, 30% ethylene glycol, 1% polyvinyl  
108 pyrrolidone-40 in 0.1M PBS) and stored at -20°C until use (Watson et al., 1986; Olthof et al.,  
109 2019).

### 110 Antibody characterization

111 The following primary antibodies were used:

112 *Mouse anti-GAD67*(1:500; monoclonal; clone 1G10.2; MAB5406; lot# 2636700; Millipore; RRID:  
113 AB\_2278725) – according to the manufacturer, the immunizing antigen is a recombinant fusion

114 protein containing unique N-terminus regions from amino acids 1-101 of *GAD67*.  
115 Immunoblotting detects a 67kDa protein in rat cerebellum and mouse microsomes;  
116 immunohistochemistry demonstrated labelling similar in distribution to *in situ* mRNA  
117 hybridization (Fong et al., 2005; Kotti et al., 2006; Ramirez et al., 2008). Use of this antibody has  
118 been published in guinea pig IC (Nakamoto et al., 2013; Foster et al., 2014; Beebe et al., 2016),  
119 as well as rat IC (Ito et al., 2009).

120 *Mouse anti-GFAP* (1:500; monoclonal; clone G-A-5; G3893; lot# 045M4889V; Sigma; RRID:  
121 AB\_477010) – according to the manufacturer, this antibody is raised against an epitope from  
122 the C-terminus of *GFAP* in purified pig spinal cord (Latov et al., 1979; Debus et al., 1983). The  
123 antibody has been shown to recognize a single band of approximately 50kDa and reacts with  
124 homologous, conserved residues across mammals (Lorenz et al., 2005). The use of this  
125 antibody has been demonstrated in many species, including mouse (Komitova et al., 2005), rat  
126 (Lennerz et al., 2008; Sanchez et al., 2009), tree shrew (Knabe et al., 2008), guinea pig (Kelleher  
127 et al., 2011; Kelleher et al., 2013) and human (Toro et al., 2006). Labelling observed in this  
128 study was consistent with these studies and the known morphology of astrocytes.

129 *Rabbit anti-calbindin D-28k* (1:1,000; polyclonal; AB1778; lot# 2895780; Millipore; RRID:  
130 AB\_2068336) – according to the manufacturer, this antibody recognizes a single band at 28kDa  
131 in human, mouse, and rat brain tissues. It does not bind to calretinin and pre-adsorption of  
132 diluted antiserum with calbindin removed all labelling in human brain (Huynh et al., 2000).  
133 Previous labelling of mouse olfactory bulb (Kotani et al., 2010), rat piriform cortex (Gavrilovici  
134 et al., 2010) and guinea pig enteric nervous system (Liu et al., 2005) all showed highly selective  
135 cytoplasmic labelling of neurons. We observed labelling consistent with previous reports.

136 *Rabbit anti-calretinin* (1:1,000; polyclonal; AB5054; lot# 2903043; Millipore; RRID: AB\_2068506)  
137 – according to the manufacturer, this antibody recognizes the 29kDa protein in mouse and rat  
138 tissues (Su et al., 2010; Yanpallewar et al., 2010). This highly conserved epitope has also been  
139 labelled in hamster (Lee et al., 2004), zebrafish (Goodings et al., 2017) and turtle (Parks et al.,  
140 2017). We observed labelling consistent with these previous reports.

141 *Rabbit anti-Iba1* (1:1,000; polyclonal; 019-19741; lot# WDE1198; Wako; RRID: AB\_839504) –  
142 according to the manufacturer, this affinity purified antibody was raised against a synthetic  
143 peptide corresponding to the C-terminus fragment of rat *Iba1*. Labelling via western blot was  
144 positive for a 17kDa band (Imai et al., 1996). We observed selective labelling of ramified

145 microglia, matching similar reports in mouse (Bulloch et al., 2008), rat (Helfer et al., 2009;  
146 Fuentes-Santamaría et al., 2012), Japanese quail (Mouriec and Balthazart, 2013), macaque  
147 (Stanton et al., 2015) and chimpanzee (Rosen et al., 2008). We observed labelling consistent  
148 with these previous reports.

149 *Mouse anti-synaptophysin* (1:500; monoclonal; S5768; lot# 103M4778; Sigma; RRID:  
150 AB\_477523) – according to the manufacturer, this antibody targets a pre-synaptic  
151 synaptosome antigen derived from rat retina, producing a 38kDa band in rat brain extracts.  
152 We observed punctate labelling, as previously reported in mouse (Wiedenmann and Franke,  
153 1985), rat (Zelano et al., 2009), guinea pig (Glueckert et al., 2008), and human (Jaafari et al.,  
154 2008).

155 *Chicken anti-homer1* (1:500; polyclonal; 160026; lot# Q86YM7-1; SySy; RRID: AB\_2631222) –  
156 according to the manufacturer, this IgY antibody is specific for residues 1-196 of human  
157 *homer1*, including splice variants a-d (Soloviev et al., 2000). These residues are highly  
158 conserved, with reactivity for mouse and rat. *Homer1* has been shown to selectively bind to  
159 glutamate receptors (Brakeman et al., 1997) and can be considered a marker of glutamatergic  
160 synapses when colocalized with synaptophysin (Ciruela et al., 2000; Sala et al., 2001; Lee et al.,  
161 2019). This antibody has recently been validated in mouse models of Alzheimer’s disease via  
162 colocalization with *synaptophysin* (Reichenbach et al., 2018).

163 Blood vessels were labelled with rhodamine conjugated Griffonia (Bandeiraea) Simplicifolia  
164 Lectin 1 (1:100; RL-1102; Vector; lot# S0926RRID: AB\_2336492), which binds to glycoproteins  
165 lining the inner lumen.

### 166 Fluorescence immunohistochemistry

167 Sections through the superior colliculus and the rostral-most third along the rostro-caudal axis  
168 through the IC were first used to optimize labelling. Data are presented from sections in the  
169 middle third of the IC along the rostro-caudal axis, which contained the CNIC, DCIC and LCIC.  
170 The location of each section through the rostro-caudal axis was referenced to an atlas of the  
171 guinea pig brainstem (Voitenko and Marlinsky, 1993).

172 All steps in the labelling protocol involved continuous gentle agitation of sections. Free-  
173 floating sections were brought to room temperature and washed 3x5mins in PBS. Sections  
174 were blocked and permeabilized in 5% normal goat serum (Vector) and 0.05% Triton X-100  
175 (Sigma) in PBS for one hour. Following blocking, a cocktail of primary antibodies was added

176 to the blocking solution and applied to sections overnight at room temperature. The next day,  
177 sections were washed 3x5mins in PBS and incubated for two hours in appropriate secondary  
178 antibodies (Invitrogen; 1:250 in blocking solution). For double labelling of *Iba1* and *GAD67*,  
179 goat anti-rabbit AlexaFluor 488 and goat anti-mouse AlexaFluor 568 were used. For double  
180 labelling of calbindin and *GFAP*, goat anti-rabbit AlexaFluor 488 and goat anti-mouse  
181 AlexaFluor 647 were used. For triple labelling of *Iba1*, *GSL1* (pre-conjugated rhodamine  
182 fluorophore) and *GFAP*, goat anti-rabbit AlexaFluor 488 and goat anti-mouse AlexaFluor 647  
183 were used. For triple labelling of *Iba1*, *homer1* and *synaptophysin*, goat anti-rabbit AlexaFluor  
184 405, goat anti-chicken AlexaFluor 568 and goat anti-mouse AlexaFluor 647 were used. Sections  
185 were then mounted on slides and coverslipped using Vectashield (Vector Labs, H-1000) and  
186 kept at 4°C until imaged. All experiments had control slides where the primary, secondary or  
187 both the primary and secondary antibodies were excluded. This allowed detection of  
188 autofluorescence and any aspecific signal and ensured only signals from primary and secondary  
189 binding to targets were imaged.

#### 190 Image acquisition

191 Sequentially acquired micrographs were taken with a confocal microscope (Leica SP5) using a  
192 wide field stage and zoom function. Images were acquired via a 40x objective for images of  
193 the entire cross-section of the IC, and a 63x objective for region of interest (ROI) panoramas  
194 and high magnification images. Whole IC images were taken using 5µm equidistant slices in  
195 the Z-plane to produce maximum intensity tiled projections. For *GAD67* and *Iba1* ROI  
196 panoramas, 6-column x 5-row tiled images were taken using 0.99µm z-slices and rendered as  
197 maximum intensity projections. High magnification images of *Iba1* and synaptic marker  
198 labelling were imaged using 0.05µm z-slices through the full cell.

#### 199 Image analyses

200 For *Iba1+* cell density estimates, tiled panorama images of the IC were subject to manual cell  
201 counts. The peripheral borders of the IC were delineated and a contour drawn, and each image  
202 cropped to its respective contour. To make fair comparisons between cases, 450µm<sup>2</sup> grids were  
203 placed across each IC panorama image and centered on the middle pixels of each micrograph  
204 in ImageJ. Only those grids which were filled entirely by stained parenchymal tissue were  
205 subject to counts. Comparisons were then made between cases, such that only grids that were



206 present in images from all four animals were included in calculation of group means and  
207 standard deviations per grid.

208 Maximum intensity projection ROI panoramas were analyzed for i) cell counts, ii) percentage  
209 field of view covered analyses, iii) individual *Iba1+* cell Sholl and iv) skeleton analyses using Fiji  
210 ImageJ (Abràmoff et al., 2004). All panorama micrographs were first processed by filtering  
211 monochrome images using a median pixel (1.5) filter and then thresholded to binary by  
212 implementing the IsoData algorithm. Cell counts, and percentage field of view covered  
213 analyses were then performed using the Analyze Particles plugin. For Sholl analyses, individual  
214 *Iba1+* microglia were cropped and a series of equidistant radiating 1µm concentric circles were  
215 plotted from the center of the cell body to the furthest radiating extent of ramification. Each  
216 intersection with a concentric ring was measured. The Skeletonize algorithm was used to  
217 display a one-pixel thick framework of each microglial cell. The Analyze Skeleton plugin  
218 calculated number of branches and branch lengths for each cell. Whole IC images of  
219 *synaptophysin* were analyzed for labelling (pixel intensity) density between sub-regions using  
220 the Measure function.

221 To measure *Iba1+* putative-interactions with *GAD67+* neurons, individual cells were cropped  
222 from panoramas, and were measured without filtering. The diameter of *GAD67+* somata were  
223 quantified by measuring the extremes of each *GAD67+* cell in the z-plane. Only cells that were  
224 entirely contained within the full z-range of the section were included. All other measures of  
225 putative interactions between *Iba1+* and *GAD67+* labelling were subject to extensive manual  
226 counts on a slice-by-slice basis through each z-stack.

227 For synaptic colocalization measurements, z-slices through *Iba1+* microglia were thresholded  
228 using the Itso algorithm to develop a mask of each slice of the cell and then converted into a  
229 stack. Synaptic marker labelling (*synaptophysin* and *homer1*) were thresholded using the  
230 Moments algorithm to create masks of each slice. To enable comparison of putative excitatory  
231 synapses, monochrome image slices of *synaptophysin* were merged with *homer1+* labelling.  
232 These stacks were then respectively merged with the masks of the *Iba1+* masked stack,  
233 enabling visualization of co-localization between putative excitatory synapses and microglial  
234 processes. A 3D Sholl analysis of volume was then conducted using concentric rings of  
235 0.025µm from the center of each *Iba1+* soma, which gave a quantitative measurement of co-

236 localization across the x, y, and z planes. Each point of colocalization detected was visually  
237 inspected and verified before being included in the dataset.

### 238 Statistical analysis

239 Data were collected in Excel spreadsheets. Statistical hypothesis testing was performed in  
240 Prism 7 (GraphPad). Factorial analyses were conducted using the non-parametric Kruskal-  
241 Wallis ANOVA with sub-region as the factor in all cases. Where appropriate, *post-hoc* tests  
242 with Dunn's method were conducted. For *post-hoc* analyses the  $\alpha$  was Šidák corrected for  
243 multiple comparisons. Spearman's rank correlations were used to investigate potential  
244 associations between dependent variables.

245 Principal component, two-step cluster and K-means squared cluster analyses were conducted  
246 in SPSS v25 (IBM). The exploratory two-step cluster analysis employed Euclidean distance  
247 measures with Schwarz's Bayesian clustering criterion. The K-means clustering analysis had 10  
248 maximum iterations and classified data into one of the two identified clusters. All 160 cell ROIs  
249 were successfully classified by this analysis. All reported P values are exact and two tailed.

## 250 **Results**

### 251 *GFAP+ astrocytes and Iba1+ microglia form the glia limitans externa and* 252 *neurovascular unit in IC*

253 We first sought to identify the distribution of *GFAP+* astrocytes and *Iba1+* microglia in adult  
254 guinea pig IC. Coronal, 60 $\mu$ m sections showed pronounced *GFAP+* and *Iba1+* labelling of the  
255 *glia limitans externa* lining the dorsal and lateral borders of the IC (Figure 1A). Extensive  
256 labelling was also distributed medially, lining the cerebral aqueduct, with ramified *GFAP+*  
257 astrocytic processes radiating into the periaqueductal grey, as well as the commissure of the  
258 IC. Interestingly, we found no *GFAP+* astrocytes throughout the IC parenchyma, save for sparse  
259 labelling of cells in the outermost layers of the DCIC and LCIC. Conversely, ramified *Iba1+*  
260 microglia tiled the parenchyma in non-overlapping domains with similar density throughout  
261 the IC, as quantified in Figure 1B.

262 Combining *Iba1* and *GFAP* labelling with the fluorescent-conjugated lectin *GSL1* revealed  
263 extensive *peri*-vascular labelling along putative penetrating arteries and arterioles (Figure 1C).  
264 Neurons expressing cytoplasmic calbindin or calretinin were distributed in the outermost  
265 regions of the cortices of the IC, matching previous reports (Zettel et al., 1997; Ouda et al.,  
266 2012) and in close proximity to vessels and *GFAP+* processes (Figure 1D).

267 These findings demonstrate that many aspects of IC glial organization mirror those reported  
268 in other brain regions, with both *GFAP+* astrocytes and *Iba1+* microglia forming the *glia*  
269 *limitans externa* and lining adjacent to blood vessels. However, the observation that *Iba1+*  
270 microglia but not *GFAP+* astrocytes were found throughout the parenchyma, suggests a role  
271 for *Iba1+* microglia in glial-neuronal putative interactions in IC.

### 272 *Distributions of Iba1+ microglia and GAD67+ somata vary between sub-regions of IC*

273 To explore the role of parenchymal microglia in IC, we acquired tiled confocal micrographs of  
274 *Iba1+* microglia (Figure 2A) and *GAD67+* neurons (Figure 2B) across whole coronal IC sections  
275 (Figure 2C). Labelling revealed putative GABAergic neurons throughout the IC, with increased  
276 cell density in high-frequency ventral regions, matching previous reports (Ito et al., 2009;  
277 Gleich et al., 2014; Beebe et al., 2016). Dividing the IC into sub-regions based on the criteria of  
278 Coote and Rees (2008) allowed definition of ROIs for comparisons between DCIC, LCIC, mid-  
279 CNIC and ventral-CNIC (VCNIC), respectively (Figure 2D). Cell counts confirmed a greater  
280 number of *GAD67+* neurons in VCNIC (Figure 2E) ( $H(3)=24.42$ ;  $p<0.001$ ) than other sub-

281 regions (*post-hoc* Dunn's tests: VCNIC vs DCIC  $p < 0.0001$ ; VCNIC vs LCIC  $p = 0.0023$ ). Mid-CNIC  
282 also had a greater number of *GAD67+* neurons than DCIC ( $p = 0.026$ ) and LCIC ( $p = 0.395$ ).  
283 Analyses of ROIs confirmed similar densities of *Iba1+* microglia cell counts between sub-  
284 regions of IC, in spite of the varying density of *GAD67+* cells (Figure 3). The DCIC had slightly  
285 more densely packed *Iba1+* microglia than other sub-regions, with a median of 88 cells  
286 (range=70 to 106) per  $432 \times 552 \mu\text{m}$  ROI. Mid-CNIC had a median of 83 (range=76 to 95), while  
287 LCIC had a median of 80 (range=63 to 104) and VCNIC had a median of 73 (range=57 to 92).  
288 However, a Kruskal-Wallis ANOVA with sub-region as the factor found no detectible  
289 difference between groups ( $H(3) = 4.91$ ,  $p = 0.179$ ).  
290 Contrastingly, the percentage field of view of *Iba1+* labelling (above a thresholded binary level,  
291 consistent between cases) was much greater in DCIC (median=14.8%; range=8.7 to 22.5) than  
292 mid-CNIC (9.5%; 7.1-13.9), LCIC (8.9% 4.9-12.4) or VCNIC (7.4%; 4.3-12.0). These differences  
293 between groups are likely a real effect ( $H(3) = 12.67$ ;  $p = 0.0034$ ; *post-hoc* Dunn's test between  
294 DCIC and VCNIC  $p = 0.002$ ). The greater amount of *Iba1+* labelling in DCIC, despite similar soma  
295 density between sub-regions, suggests differences in other aspects of *Iba1+* microglia  
296 morphology.

### 297 *Iba1+* microglia in DCIC are more ramified than other sub-regions of IC

298 We predicted that the stronger *Iba1+* microglia labelling in DCIC neuropil was primarily due  
299 to a greater number and extent of ramifications compared to other sub-regions of IC. To test  
300 this, we conducted Sholl analyses for a total of 40 cells per sub-region ( $n = 160$ ). The maximum  
301 intensity projection of each *Iba1+* microglial cell was imaged and analyzed in x and y  
302 dimensions.

303 Cells were identified and selected from ROI images (Figure 4A&B). Background/non-cellular  
304 labelling was cropped (Figure 4C) and cellular labelling thresholded to generate binary images  
305 (Figure 4D). The number of intersections at every micrometer distance from the center of the  
306 soma was calculated (Figure 4E). Binary thresholded cells were also skeletonized to derive  
307 information about the shape and structure of ramifications, such as the number of branches  
308 and maximum branch length (Figure 4F).

309 *Iba1+* microglia were more ramified in DCIC than mid-CNIC, LCIC or VCNIC at all distances  
310 away from the soma (Figure 5A). The total number of intersections of every ramification, across  
311 cells (independent of distance from the soma) had a median value of 438 in DCIC (IQR=385 to

312 500). This was greater than in mid-CNIC (332;  $\pm 284$ -399), LCIC (363;  $\pm 326$ -422), or VCNIC (353;  
313  $\pm 302$ -400) (Figure 5B). A Kruskal-Wallis one-way ANOVA on ranks, with sub-region as the  
314 factor found the differences between sub-regions of IC were likely a real effect ( $H(3)=54.36$ ;  
315  $p<0.0001$ ). *Post-hoc* analyses via Dunn's tests showed differences between DCIC and the other  
316 three sub-regions were likely to be a real effect (all  $p<0.0001$ ).

317 Analyses of skeletonized *Iba1+* microglia revealed those in DCIC also had a greater number of  
318 branches (Figure 5C), with a median of 269 ( $\pm 222$ -312). This was greater than mid-CNIC (183;  
319  $\pm 150$ -229), LCIC (193;  $\pm 165$ -224), and VCNIC (165;  $\pm 138$ -201). These differences were also  
320 likely a real effect ( $H(3)=71.30$ ,  $p<0.0001$ ; Dunn's tests DCIC vs other sub-regions all  $p<0.0001$ ).  
321 Conversely, maximum branch length, defined as the longest distance covered by any  
322 ramification of skeletonized *Iba1+* microglia without branching, followed the opposite trend.  
323 Longest distances were found in VCNIC (median=14.44 $\mu$ m; IQR=12.76-17.18) (Figure 5D).  
324 Shorter distances were found in LCIC (14.01; IQR $\pm$ =11.92-16.16), mid-CNIC (12.86;  $\pm 11.22$ -  
325 15.60) and DCIC (11.62;  $\pm 11.26$ -15.01). The difference between VCNIC and DCIC was likely a  
326 real effect ( $H(3) = 12.18$ ,  $P = 0.0068$ ; *post-hoc* Dunn's test  $p=0.0079$ ).

### 327 *Iba1+* putative interactions reveal two novel types of *GAD67+* neurons in IC

328 We hypothesized that *GAD67+* neurons, which are known to receive a variety of types of  
329 presynaptic contacts (Ito et al., 2009; Beebe et al., 2016), may also receive different types of  
330 *Iba1+* inputs. To examine the nature of *Iba1+* putative interactions with *GAD67+* neurons, we  
331 quantified five dependent variables from each cell ROI ( $n=160$ ): (i) *GAD67+* soma maximum  
332 diameter; (ii) percentage of *GAD67+* soma abutted by *Iba1+* processes; (iii) number of *Iba1+*  
333 microglia with processes abutting each *GAD67+* soma; (iv) number of distinct *Iba1+* processes  
334 abutting each *GAD67+* soma; and (v) total length of *Iba1+* processes abutting each *GAD67+*  
335 soma ( $\mu$ m). These features were calculated from micrographs such as the representative  
336 example in Figure 6A, which shows a *GAD67+* neuron being abutted by two *Iba1+* microglia.  
337 A correlation matrix revealed weak associations between *GAD67+* soma maximum diameter  
338 (i) and the other four dependent variables (ii-v) (Figure 6B). There were stronger correlations  
339 between the four *Iba1* related variables (ii-v). As these variables were only weakly correlated  
340 with *GAD67+* neuron diameter, we further investigated whether a multivariate analysis could  
341 better explain the observed distributions.

342 We conducted an exploratory two-step cluster analysis including all five variables. We  
343 employed Euclidean distance measures with Schwarz's Bayesian clustering criterion. The model  
344 found two clusters with good silhouette measures of cohesion and separation ( $\sim 0.7$ ),  
345 suggesting good explanatory power. We then conducted a principal component analysis for  
346 the five variables across all cells in all sub-regions of the IC. The data showed a clear  
347 dissociation between *GAD67+* neuron diameter in one cluster and the other four variables,  
348 which clustered together (Figure 6C). Both clusters were categorized using a standard  
349 correlation coefficient of  $>0.5$  as a cut-off value, which showed one cluster was explained by  
350 only the *GAD67+* neuron diameter variable, while the other cluster had significant  
351 contributions from all four of the *Iba1+* related variables. These trends were also true for all  
352 sub-region analyses in IC (Figure 6Di-iv).

353 We conducted a K-means squared cluster analysis with 10 maximum iterations, which classified  
354 data into two clusters. All 160 cell ROIs were classified by this analysis. There were 42 cases in  
355 cluster 1, and 118 in cluster 2. To visualize the contribution of each of the four *Iba1* related  
356 variables, each was plotted as a function of *GAD67+* neuron diameter (Figure 7A-D). These  
357 scatterplots revealed a dissociation with little overlap between the two clusters using the  
358 percentage *Iba1+* coverage onto *GAD67+* somata (Figure 7A). There was perfect  
359 discrimination between the clusters using a cut-off value of 0.28 of the normalized total  $\mu\text{m}$ s  
360 of *Iba1+* putative interactions with *GAD67+* neuron somata (Figure 7B). The cut-off line (grey  
361 dash) was perpendicular to the *GAD67+* neuron diameter axis, showing that this value was  
362 independent of *GAD67+* soma diameter. Conversely, the number of *Iba1+* cells contacting  
363 each *GAD67+* soma had a significant degree of overlap with little difference between clusters  
364 (Figure 7C). The number of *Iba1+* processes abutting *GAD67+* somata had little overlap  
365 between distributions (Figure 7D).

366 To compare the ability of each of these variables to independently discriminate between the  
367 two clusters, we conducted ROC analyses (Figure 7E). These data revealed that while each  
368 variable had an area under the curve  $>0.5$ , the three variables relating to the nature of *Iba1+*  
369 processes abutting *GAD67+* neurons had the best discriminatory power.

370 *Iba1+ putative interactions with GAD67+ neurons show little difference between sub-*  
371 *regions of IC*

372 We explored whether any of the variables or clusters identified had a relationship to the sub-  
373 region of IC in which the cells were located. Diameter of *GAD67+* somata did not vary between  
374 sub-regions (Figure 8A) ( $H(3)=5.3$ ;  $p=0.151$ ). A small difference was found for the percentage  
375 of *GAD67+* soma covered by *Iba1+* processes (Figure 8B) ( $H(3)=9.9$ ;  $p=0.019$ ). *Post-hoc* Dunn's  
376 tests suggested a potential real difference between DCIC and VCNIC ( $p=0.012$ ). However, there  
377 was extensive overlap between the distributions so there is a reasonable chance this may not  
378 be a true effect. The number of *Iba1+* cells abutting each *GAD67+* somata (Figure 8C)  
379 ( $H(3)=6.44$ ;  $p=0.092$ ), the number of *Iba1+* contacts onto *GAD67+* somata (Figure 8D)  
380 ( $H(3)=5.55$ ;  $p=0.141$ ), and the normalized total number of  $\mu\text{m}$  covered by *Iba1+* contacts onto  
381 *GAD67+* somata (Figure 8E) ( $H(3)=4.64$ ;  $p=0.200$ ) did not differ between sub-regions.  
382 However, the number of *GAD67+* cells contacted by each *Iba1+* cell was greater in VCNIC  
383 (Figure 8F) ( $H(3)=21.32$ ;  $p=0.0006$ ). *Post-hoc* Dunn's tests revealed a likely real difference  
384 between VCNIC and DCIC ( $p=0.005$ ). We interpret this as being due to the greater density of  
385 *GAD67+* neurons in VCNIC (Figure 2E).

386 Both clusters had a similar proportion of ROIs from each of the four sub-regions of IC (cluster  
387 1: 10 DCIC (24%), 14 mid-CNIC (33%), 13 LCIC (31%), 5 VCNIC (12%); cluster 2: 30 DCIC (25%),  
388 26 mid-CNIC (22%), 27 LCIC (23%), 35 VCNIC (30%)).

389 *Iba1+ microglial processes colocalize at puncta with synaptophysin and homer1 in*  
390 *greater numbers in DCIC*

391 To determine whether *Iba1+* processes are present at synapses in IC, *Iba1* was co-labelled with  
392 the pre-synaptic marker *synaptophysin* and a marker of glutamatergic post-synapses, *homer1*.  
393 Figure 9A shows a tiled confocal micrograph of *synaptophysin* (magenta) and *Iba1* (green)  
394 labelling. A clear shift in *synaptophysin* density can be seen from DCIC to CNIC. Quantification  
395 from ROIs in each sub-region confirmed *synaptophysin* was more densely distributed in DCIC  
396 than other sub-regions and mirrored the distributions of *Iba1+* percentage field of view (Figure  
397 9B). Note that these percentage field of view values are calculated from different ROIs than  
398 the analyses presented earlier.

399 To examine the cellular location of these puncta on *Iba1+* microglia, we imaged three cells in  
400 each sub-region in very fine z-slice steps ( $0.05\mu\text{m}$ ). A representative image of one z-plane

401 through an *Iba1+* microglial cell in VCNIC is shown in Figure 10A-D, showing a point of  
402 colocalization between *synaptophysin*, *Iba1*, and *homer1* (arrowhead). A rectangular ROI was  
403 drawn around colocalized pixels of approximately  $0.5\mu\text{m}^2$ . Plotting spectrographs of pixel  
404 intensity for pairwise combination of each of the three labels showed positive relationships  
405 (Figure 10E-G), with colocalization rates ranging from 76.5% to 95.0%. 3D reconstructions of  
406 *Iba1+* microglia, including all ramifications (Figure 10H, green), and points of colocalization  
407 with *synaptophysin* and *homer1* (Figure 10H, magenta), allowed visualization of the locations  
408 of these markers.

409 We conducted 3D volume Sholl analyses (Figure 11A) which revealed *Iba1+* microglia in DCIC  
410 had a greater number of colocalized puncta. Fitting each sub-region with a LOWESS regression  
411 revealed this trend occurred at all distances from the soma. Quantification of total number of  
412 puncta per cell in each sub-region showed that DCIC had a greater number than other sub-  
413 regions (Figure 11B). We also determined the location of each puncta with respect to the  
414 branching ramifications of each *Iba1+* cell. Puncta were classified as being located on the  
415 soma, primary, secondary, tertiary or quaternary branches. Figure 11C shows that when  
416 normalized, the relative proportion of puncta locations on *Iba1+* microglia was similar across  
417 sub-regions (Table 1;  $\chi^2=7.20$ ;  $p=0.844$ ).



## 418 **Discussion**

419 These findings reveal *Iba1+* microglia express morphologies and putative synaptic interactions  
420 commensurate with a functional role in activity dependent neurotransmission and synaptic  
421 plasticity in the healthy, mature auditory system. Our data show that *Iba1+* microglia  
422 ramifications, but not those of *GFAP+* astrocytes, interact with *homer1+* (putative  
423 glutamatergic) synapses in IC parenchyma. Taking advantage of the specialized and  
424 functionally diverse sub-regions of IC, we found the first evidence, to our knowledge, for a  
425 greater number of such synapses in DCIC, an area known to receive a greater proportion of  
426 glutamatergic corticofugal contacts, than other IC sub-regions. Cluster analyses revealed two  
427 new types of *GAD67+* neuron defined by the extent of *Iba1+* microglial contacts onto their  
428 soma. These data reshape our understanding of the role of microglia in 'normal' processing  
429 within sensory systems and propose hitherto unexplored avenues of investigation. Similar  
430 approaches in other brain areas may produce novel understandings of brain organization.

### 431 Significance of sub-regional differences

432 Some aspects of central sensory processing can be interpreted through triad models of  
433 organization. Such models are based on observations that central sub-regions of sensory  
434 pathways are dominated primarily by i) ascending innervation producing brisk responses at  
435 short latencies to simple stimuli. Located adjacent are at least two regions with longer response  
436 latencies - one of which typically receives ii) a diversity of polymodal inputs, while the other is  
437 iii) primarily driven by descending, top down afferents. In the somatosensory system, these  
438 have been respectively termed the lemniscal, para-lemniscal and extra-lemniscal pathways (Yu  
439 et al., 2006), while in the auditory system the terms core, belt and para-belt have been coined  
440 (Kaas and Hackett, 1999). These regions exhibit differing connective as well as  
441 cytoarchitectonic and chemoarchitectonic organization (Sweet et al., 2005).

442 In IC, there is longstanding evidence for a triad model of organization using a diversity of  
443 methodologies. These include electrophysiology (Syka et al., 2000) , fMRI (Baumann et al.,  
444 2011; De Martino et al., 2013), histology (Faye-Lund and Osen, 1985), immunohistochemistry  
445 (Coote and Rees, 2008) and tract tracing of projections (for review of afferent and efferent  
446 inputs see Malmierca and Hackett (2010) and Schofield (2010)). The present study provides  
447 evidence that *Iba1+* microglial processes, despite superficially appearing similar throughout  
448 IC (Figure 1&3), also exhibit profound differences between sub-regions (Figure 5).

449 The greater density of *Iba1+* microglial processes at *synaptophysin+* and *homer1+* synapses  
450 in DCIC has implications for auditory processing. Cortical regions of IC exhibit much stronger  
451 novelty detection and stimulus specific adaptation than CNIC (Ayala and Malmierca, 2013).  
452 This may partly relate to the primary afferent drive to DCIC being descending corticofugal  
453 fibers (Herbert et al., 1991; Winer et al., 1998; Bajo and Moore, 2005; Bajo et al., 2006).  
454 Projections to DCIC from auditory cortex originate from glutamatergic (Feliciano and  
455 Potashner, 1995) pyramidal cells in layer V (Games and Winer, 1988; Winer and Prieto, 2001).  
456 Corticofugal inputs to DCIC primarily target glutamatergic IC neurons (Nakamoto et al., 2013),  
457 while large *GAD67+* neurons in DCIC are a source of tectothalamic inhibition with shorter  
458 response latencies than other cells in DCIC (Geis and Borst, 2013). How the greater proportion  
459 of *Iba1+* synapses in DCIC influences auditory processing is unknown, but one might suggest  
460 on the basis of greater density of *synaptophysin* labelling in DCIC, that there are a greater  
461 number of synapses *per se*. Certainly the DCIC receives a greater diversity of inputs than CNIC,  
462 including from auditory cortex, the contralateral IC (Orton et al., 2016), and ascending  
463 projections from the brainstem. However, the highly plastic nature of synaptic processing in  
464 DCIC leads to the speculation that *Iba1+* microglial processes may actively contribute to and  
465 shape synaptic processing and plasticity therein. Evidence for microglial involvement in such  
466 processing has been described in other models, including synaptic stripping and removal of  
467 existing synapses (Trapp et al., 2007), or sensing neuronal synaptic activity (Pocock and  
468 Kettenmann, 2007) in an activity dependent manner (Wake et al., 2009; Tremblay et al., 2010).  
469 The latter may facilitate microglial influence over synaptic plasticity via modulation of  
470 glutamatergic (Hayashi et al., 2006) or purinergic (Tsuda et al., 2010) neurotransmission.  
471 Corticofugal inputs to DCIC have been shown to play an essential role in auditory learning and  
472 plastic reweighting of cues (Bajo et al., 2010; Keating et al., 2013). These connections likely  
473 underlie elements of human adaptation in unilateral hearing loss (Kumpik and King, 2019),  
474 though molecular mechanisms for these observations are underexplored. Intriguingly, *homer1*  
475 has recently been shown to mediate behavioral plasticity in association with metabotropic  
476 glutamatergic synaptic plasticity in hippocampus (Wagner et al., 2014; Clifton et al., 2017;  
477 Gimse et al., 2018). The presence of *Iba1+* processes at *homer1+* synapses suggests a  
478 microglial role in modulating synaptic function and plasticity in DCIC, potentially in a similar  
479 manner to that shown in other brain regions.

## 480 Two novel clusters of GABAergic neurons

481 As the auditory pathway contains a large proportion of inhibitory neurons, with around a  
482 quarter of neurons being GABAergic (Oliver et al., 1994; Merchán et al., 2005), understanding  
483 their structure, function, and organization is a fundamental question. Previous approaches to  
484 classifying *GAD67+* neurons in IC have focused on soma size (Roberts and Ribak, 1987a, 1987b;  
485 Ono et al., 2005) coupled with axo-somatic inputs (Ito et al., 2009), perineuronal nets (Beebe  
486 et al., 2016) or cytoplasmic calcium binding protein expression (Ouda and Syka, 2012; Engle et  
487 al., 2014). The present analyses show that while there is merit to these approaches, other  
488 features of GABAergic sub-types exist. Indeed, we have discovered that *GAD67+* cells can be  
489 classified into two distinct clusters based on the total amount of *Iba1+* contacts onto their  
490 soma (Figure 7). That GABAergic neurons in IC can be defined based on *Iba1+* inputs suggests  
491 that microglia are essential to the structure and function of IC processing in the mature, adult  
492 auditory system.

493 ROC analyses revealed that the two clusters could be distinguished by the three variables that  
494 quantified different aspects of *Iba1+* processes but not by the number of *Iba1+* microglial cells  
495 abutting each *GAD67+* neuron. This may reflect the highly motile and dynamic nature of  
496 microglial processes, even under quiescent conditions (Wake et al., 2009). Other features of  
497 GABAergic neurons in IC, such as their discharge patterns and expression of associated ion  
498 channels also do not relate to soma size (Ono et al., 2005). Interestingly, the two newly  
499 identified clusters of *GAD67+* neurons did not differ in their relative proportion between the  
500 four sub-regions in IC. Future work may investigate the differing afferent neural inputs to and  
501 efferent target of these cells, to identify likely physiological and connectional differences  
502 between clusters and their relationship to GABAergic signaling in auditory processing.

## 503 Technical Considerations

504 The use of primary antibodies in less studied species such as guinea pig can be challenging  
505 due to potential differences in epitopes and when not adequately controlled for, this may lead  
506 to spurious observations (Schonbrunn, 2014). This is particularly important when using  
507 exploratory approaches such as in the present study, to ensure all analyses are predicated on  
508 specific and selective labelling (Voskuil, 2017). We therefore conducted extensive control  
509 experiments, excluding primary antibody only, secondary antibody only and both antibodies,

510 as well as changing mounting media and solutions throughout optimization of labelling, to  
511 ensure that analyses were based on true labelling.

512 The lack of *GFAP+* astrocytes in IC parenchyma was surprising and necessitated numerous  
513 confirmatory experiments. However, in all cases, a lack of *GFAP+* astrocytes in the parenchyma  
514 was found alongside extensive labelling in *peri*-vascular regions and the *glia limitans externa*,  
515 demonstrating consistency within and between cases. The lack of *GFAP+* astrocytes in IC  
516 parenchyma does not exclude the possibility that astrocytes reside throughout IC. Indeed, a  
517 recent report employing SR101 as a marker revealed a network of putative astrocytes  
518 throughout CNIC (Ghirardini et al., 2018). However, there is some labelling of oligodendrocytes  
519 with this marker, which hampers interpretability in studies trying to selectively label astrocytes  
520 (Hill and Grutzendler, 2014). Functional differences between astrocytes in CNIC and the outer  
521 layers of DCIC and LCIC have been suggested previously via 3-chloropropanediol-induced  
522 lesions, which selectively destroyed the former but not the latter (Willis et al., 2003; Willis et  
523 al., 2004). The present study leads to the speculation of fundamental gliochemical and  
524 physiological differences that may relate to the sub-region specific roles astrocytes and  
525 microglia play in their local milieux (Lawson et al., 1990; Olah et al., 2011). Recently, RT-PCR of  
526 single IC astrocytes revealed expression of functional inhibitory neurotransmitter transporters  
527 *GlyT1*, *GAT-1*, and *GAT-3* (Ghirardini et al., 2018). Sub-regional differences in *GAD67+* neurons  
528 in the present study suggest that GABAergic and glycinergic signaling released from and  
529 received by glial cells may also exhibit such variations throughout IC and perhaps in other  
530 structures.

531 Colocalization of *synaptophysin* and *Iba1* with *homer1* does not guarantee that this labelling  
532 is representative of neuron-neuron chemical synapses. *Homer1* has been shown to localize  
533 with metabotropic glutamate receptors on astrocytes (Buscemi et al., 2017). Due to the  
534 absence of parenchymal *GFAP* labelling in the present study, we can exclude these astrocytes  
535 as potential *loci* of *homer1+* labelling, but we cannot rule out non-*GFAP* expressing astrocytes.  
536 As astrocytes are known to interact at synapses, this would not exclude the possibility of  
537 functional neuron-neuron chemical synapses being identified using this approach. However,  
538 the strong weight of probability is that many of the observed *loci* of colocalization between  
539 *synaptophysin*, *Iba1*, and *homer1* are chemical synapses between neurons, closely abutted by  
540 microglial processes.

541 Conclusions

542           There is a wealth of literature that has explored the electrophysiological nature of  
543 neurons in sensory systems, but our knowledge of glial cells lags far behind. We have shown  
544 that *Iba1+* microglia, but not *GFAP+* astrocytes, colocalize at synapses throughout IC, with a  
545 greater number in DCIC, a sub-region specialized to mediate top-down plasticity. Furthermore,  
546 we discovered two new clusters of *GAD67+* neurons which can be distinguished based on the  
547 total amount of *Iba1+* contacts they receive. These data highlight the fundamental role  
548 microglia play in the organization and likely function of sensory systems in the healthy mature  
549 brain.

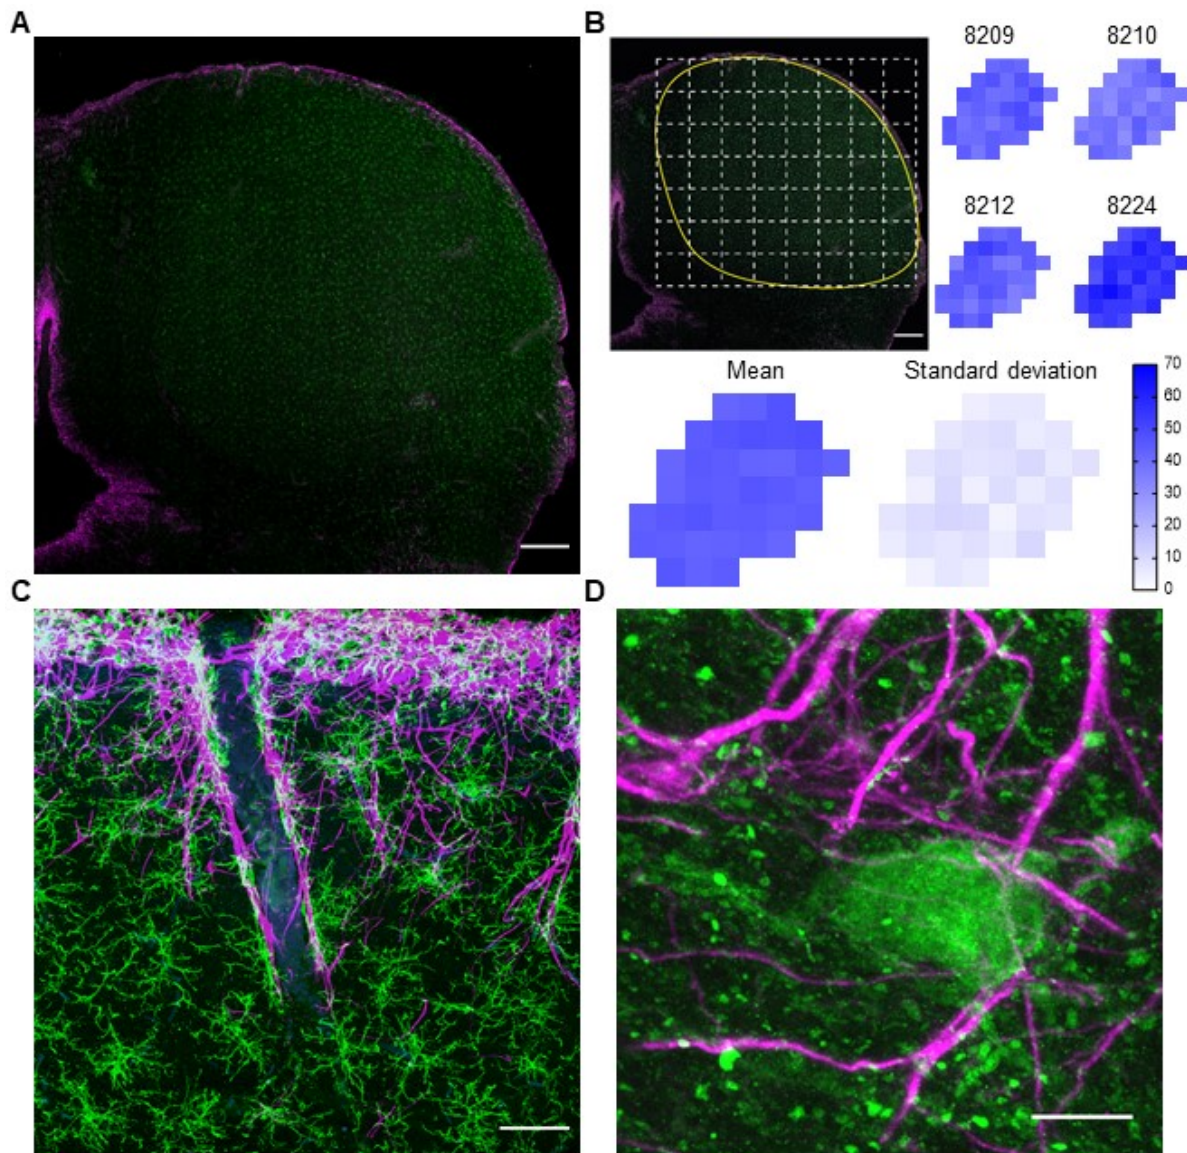

550

551 **Figure 1.** Microglia and astrocytes form the *glia limitans externa* and *peri-vascular* borders but

552 only microglia tile the parenchyma. (A) Tiled maximum intensity projection confocal

553 micrograph of *GFAP*<sup>+</sup> astrocytes (magenta) and *Iba1*<sup>+</sup> microglia (green) in IC. Scale bar 400µm.

554 Note that *GFAP* labelling is restricted to the peripheral borders and penetrating vessels while

555 *Iba1* is evenly distributed throughout. (B) Quantification of *Iba1*<sup>+</sup> somata counts per 450µm<sup>2</sup>

556 grid within the parenchyma across all four cases. Numbers on top row refer to individual

557 animals. (C) Confocal micrograph showing *GFAP*, *Iba1* and *GSL1* (blue) labelling of a

558 penetrating arteriole coursing into IC. Scale bar 50µm. (D) Confocal micrograph showing a

559 *calbindin* (green) expressing neuron in the outer layers of the LCIC surrounded by *GFAP*<sup>+</sup> axo-

560 somatic processes. Scale bar 10µm.

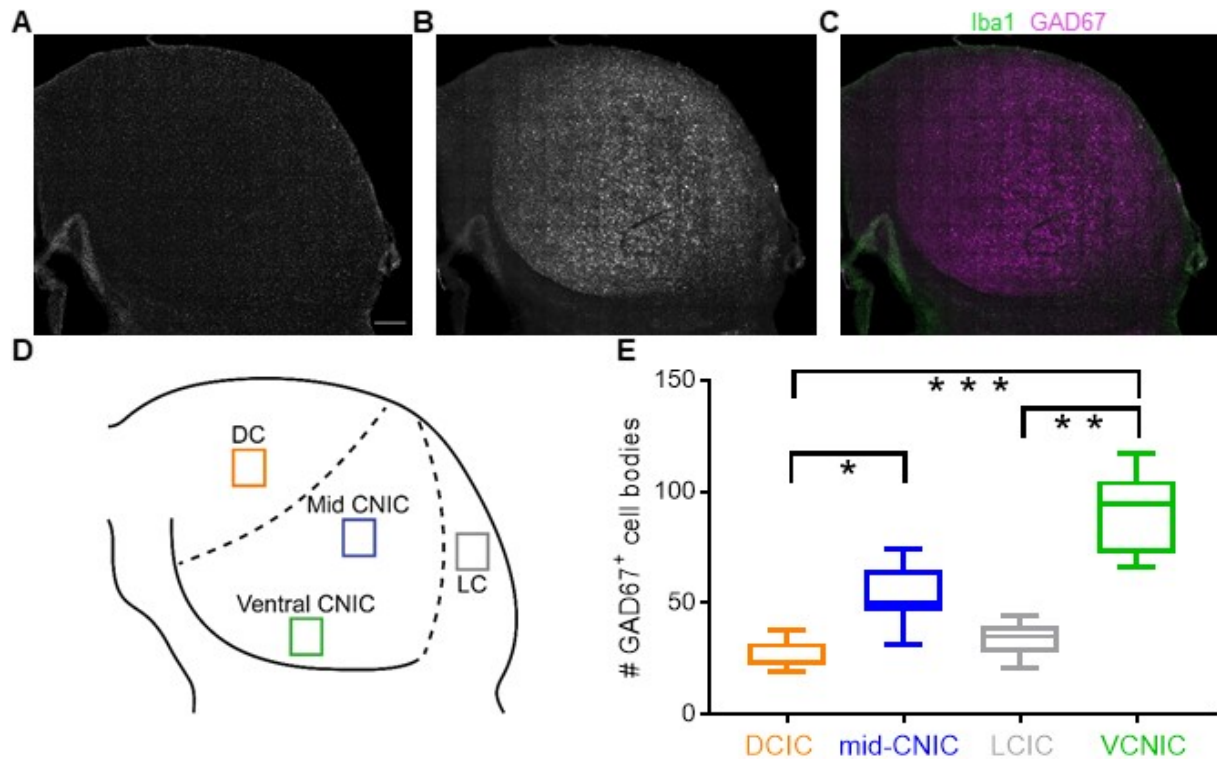

561

562 **Figure 2.** *GAD67*+ neurons vary in density between sub-regions of IC. (A) Tiled confocal  
563 micrograph showing *Iba1*+ microglia tiling IC parenchyma. Scale bar 400 $\mu$ m (same for B and  
564 C). (B) *GAD67*+ neuropil can be seen to demarcate the medial and ventral borders of the IC.  
565 *GAD67*+ neurons are found throughout IC but vary in density. (C) Merge of A (green) and B  
566 (magenta). (D) Borders of IC sub-regions were delineated using those defined by Coote and  
567 Rees (2008). ROIs were located within distinct sub-regions of IC that could be clearly  
568 distinguished from one another. (E) Box plot showing *GAD67*+ somata counts in each sub-  
569 region of interest, across cases. The VCNIC consistently had the highest number of *GAD67*+  
570 somata while numbers in DCIC and LCIC were lower than mid-CNIC.

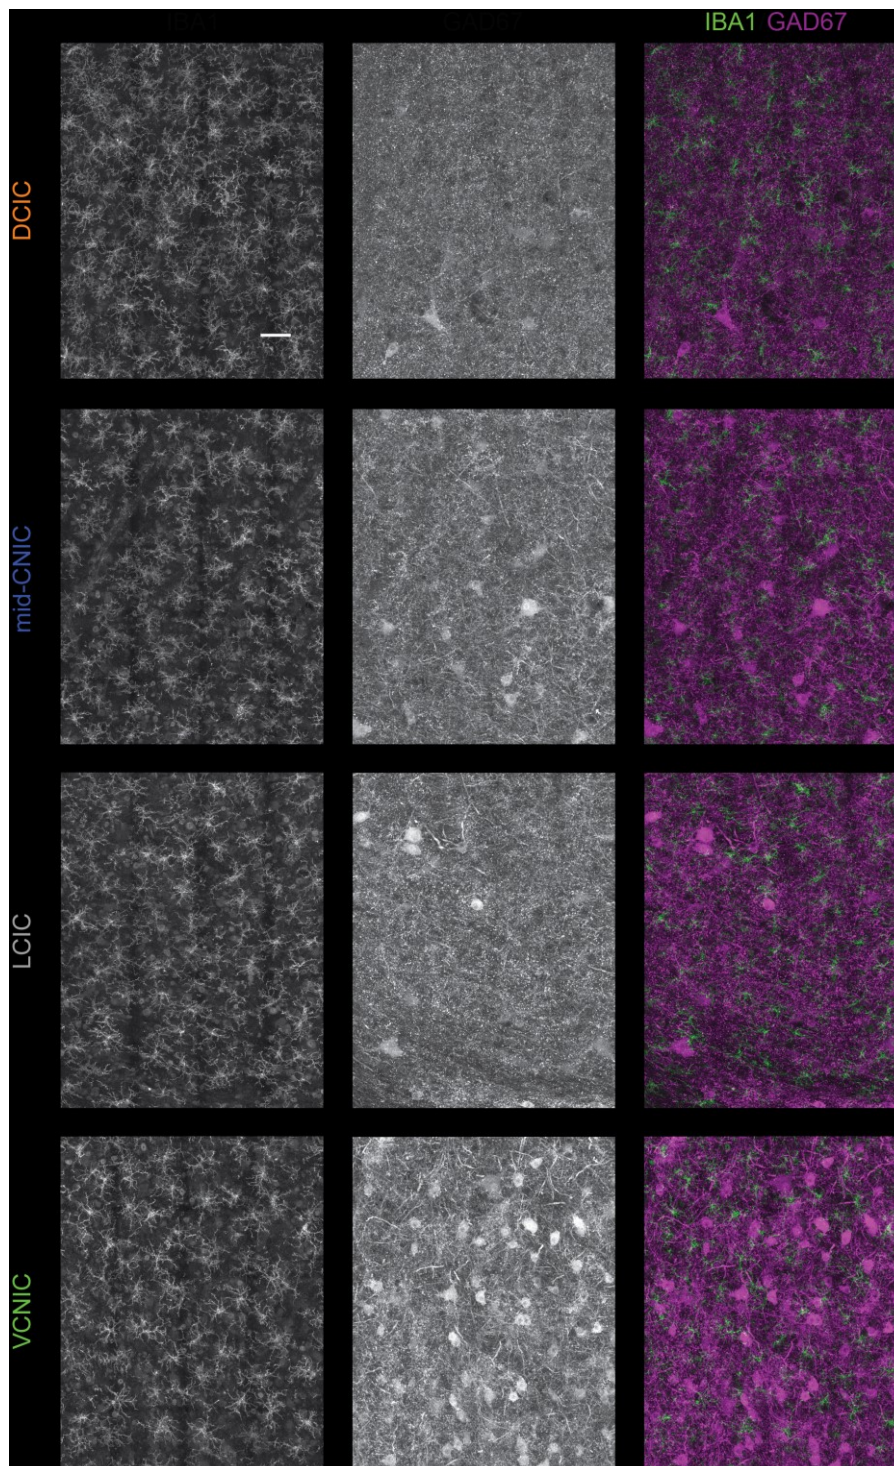

571

572 **Figure 3.** Representative ROI panoramas show differences between *Iba1+* and *GAD67+* cells  
573 in sub-regions of IC. Scale bar in (A) 50 $\mu$ m. Same scale for all panels. Maximum intensity  
574 projections of tiled confocal panoramas in all sub-regions show (left column; A-D) *Iba1+*  
575 microglia tiling the parenchyma with similar density. Conversely, labelling of *GAD67+* somata  
576 (middle column, E-H) reveals varied cell densities between sub-regions. Merging both labels  
577 (right column; I-L) reveals intercalating of *Iba1+* processes with *GAD67+* labelling.



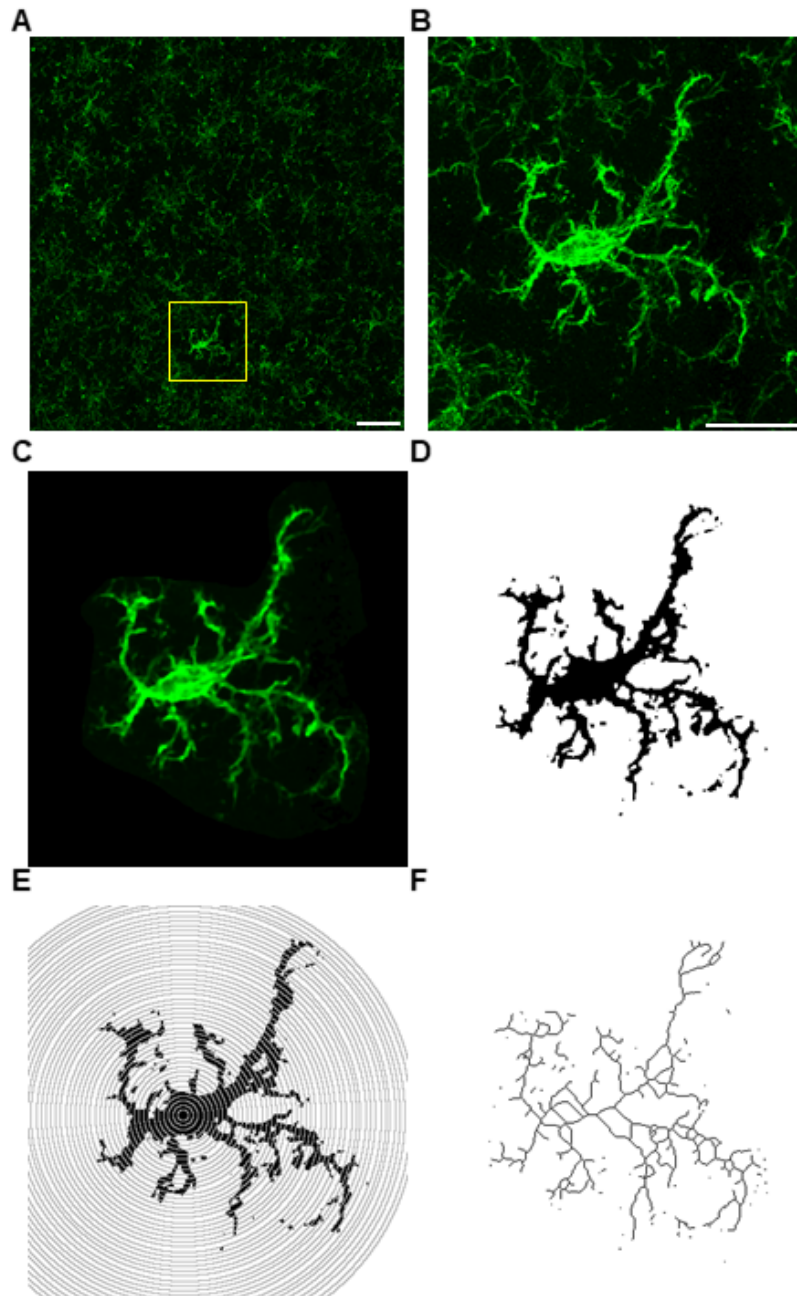

578

579 **Figure 4.** Process for Sholl analyses to quantify morphological characteristics of *Iba1+*  
580 microglia. (A) Example of maximum intensity projection of ROI tiled confocal micrographs  
581 showing *Iba1+* microglia in IC. A 6-column x 5-row field of view tiled image was taken using  
582 0.99µm z-slices. Individual cells were subject to Sholl analysis (yellow box inset). Scale bar  
583 50µm. (B) Extracted cell from (A) showing high resolution imaging of soma and processes  
584 surrounded by non-cellular labelling. Scale bar 20µm. Same scale bar for panels C-F. (C) Non-  
585 cellular labelling was cropped and (D) thresholded to binarize cellular processes. (E) Sholl  
586 analyses were performed at 1µm resolution from binarized images. (F) Skeletonized cell  
587 framework from (D) to be analyzed for number of branches and max branch length.

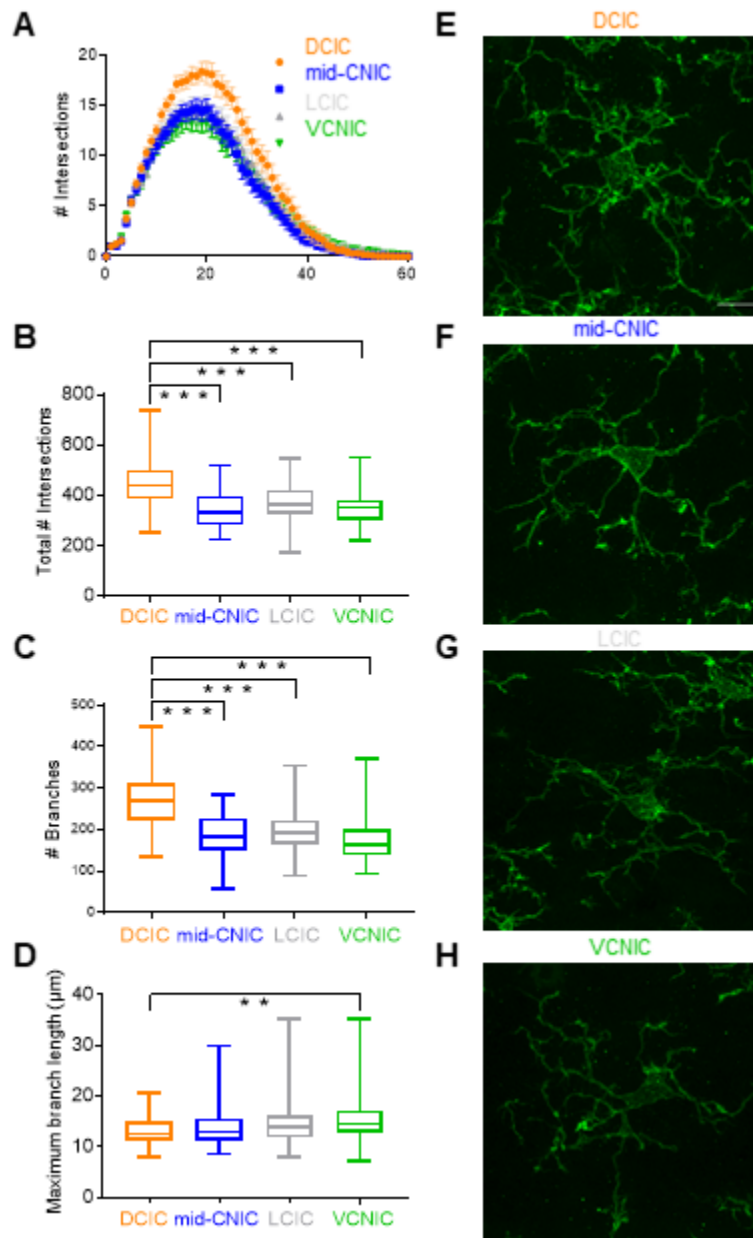

588

589 **Figure 5.** *Iba1+* microglia are more ramified in DCIC than other sub-regions of IC. (A) Sholl  
590 analyses (mean  $\pm$  95% confidence intervals) showing *Iba1+* microglia in DCIC have greater  
591 numbers of ramifications than other IC sub-regions at all distances from the soma. (B) Total  
592 number of ramification intersections independent of distance from soma are greater in DCIC.  
593 (C) Greater number of intersections in DCIC are due to a greater number of branching  
594 ramifications. (D) Maximum branch length, a measure of how long ramifications travel before  
595 branching, are longest in VCNIC and shortest in DCIC. Representative examples of *Iba1+*  
596 microglia in (E) DCIC, (F) mid-CNIC, (G) LCIC and (H) VCNIC. Scale bar 10µm. Same scale bar  
597 for F-H.

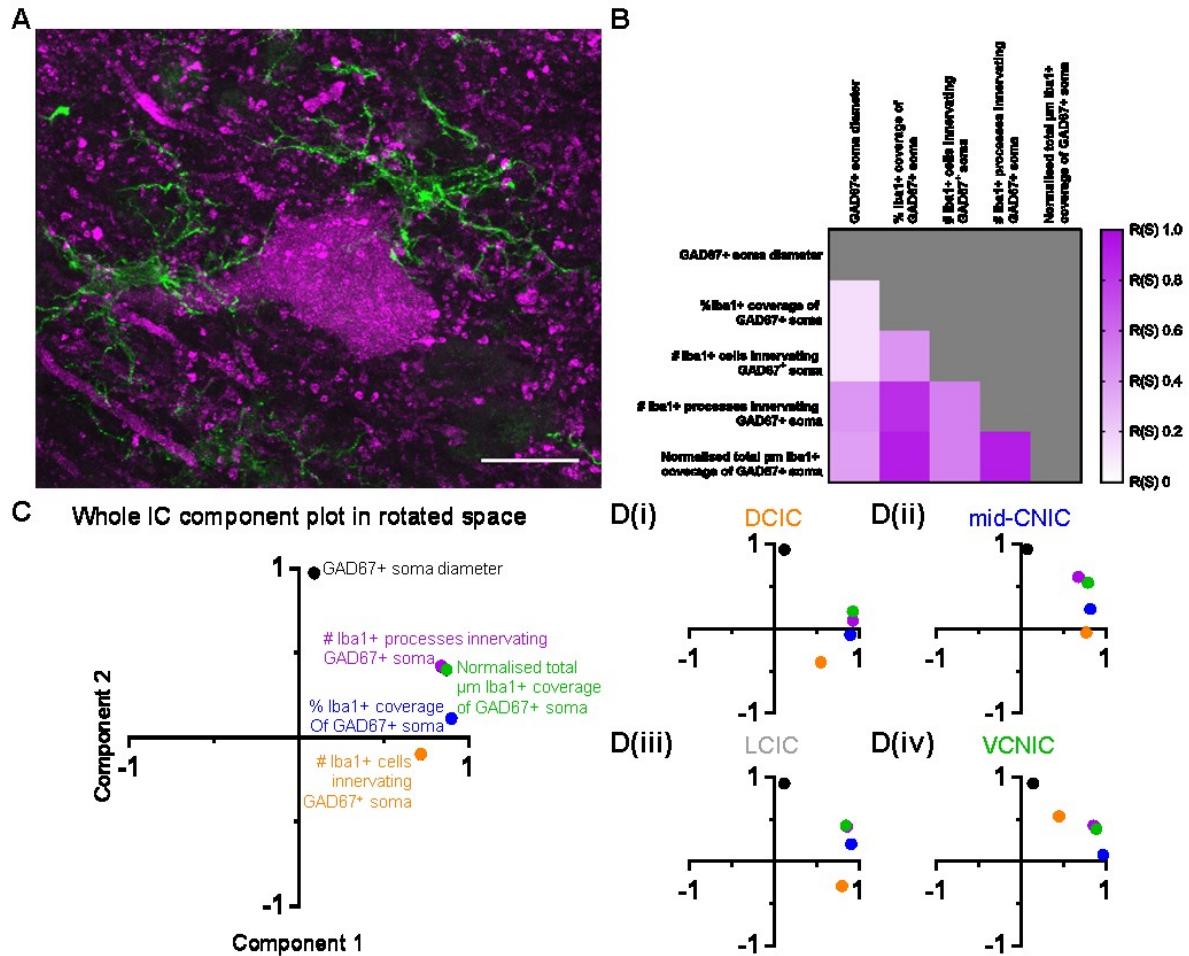

598

599 **Figure 6.** (A) Representative *GAD67+* cell (magenta) receiving abutting somatic processes  
600 from two *Iba1+* microglia (green). Scale bar 20 $\mu\text{m}$ . (B) Correlation matrix showing Spearman's  
601 rank correlation coefficient for each combination of measures derived from putative  
602 interactions between *Iba1+* microglia and *GAD67+* cells. Note lower values in first column. (C)  
603 Principal component analysis of the five variables in (B). *GAD67+* soma diameter separated  
604 from the other four variables, which grouped together. (D) As (C) but for each sub-region in  
605 IC, showing similar findings in all sub-regions, suggesting robust clustering throughout IC.

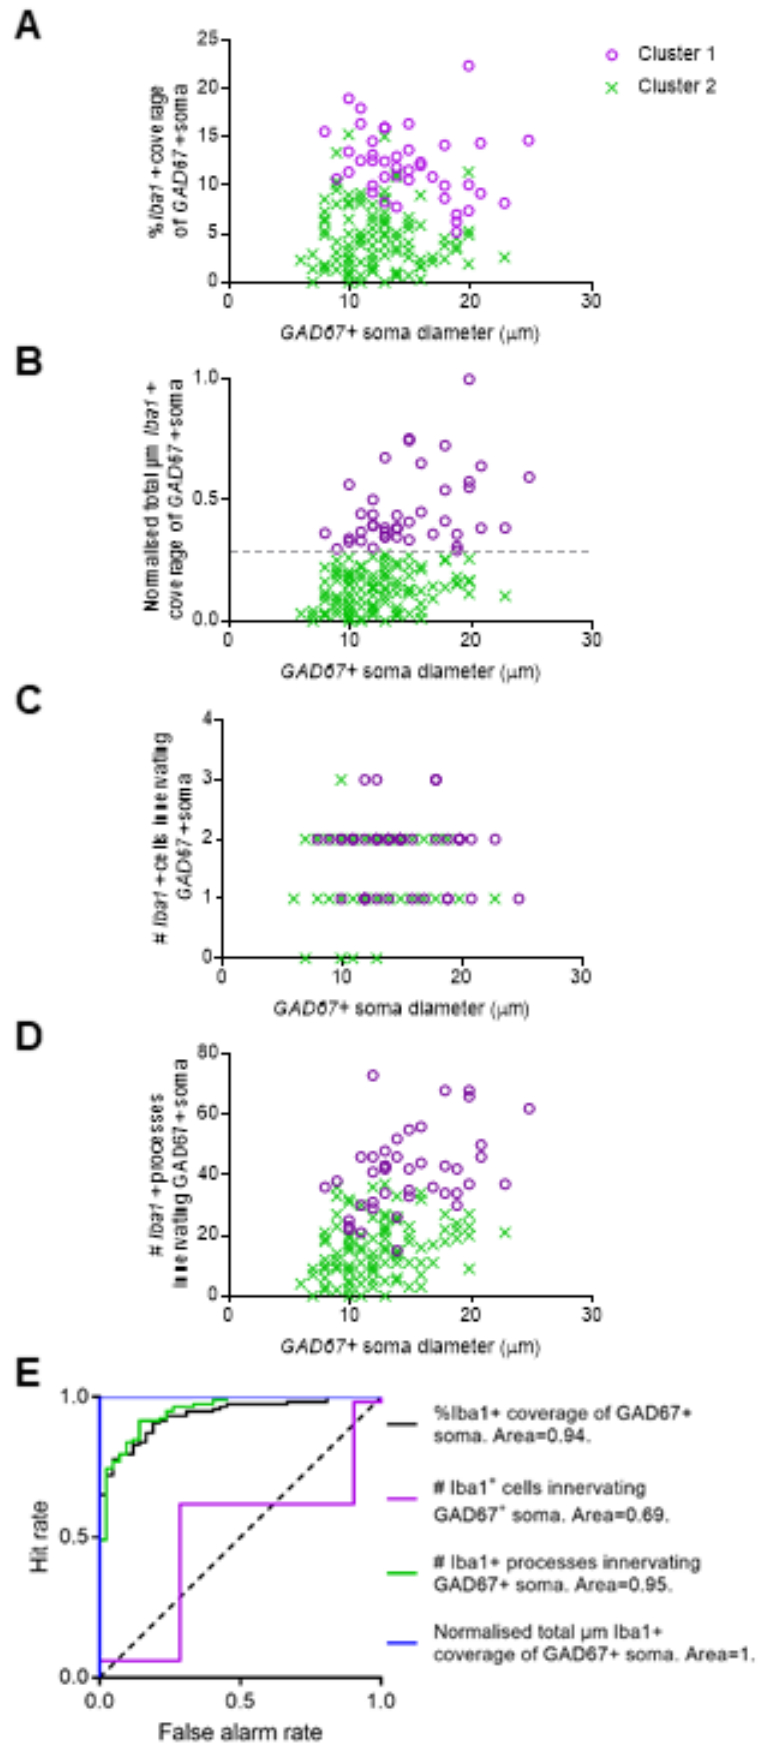

607 **Figure 7.** *GAD67+* neurons in IC can be classified into two clusters based on the amount of  
608 somatic *Iba1+* contacts they receive. Scatterplots showing each *GAD67+* cell (n=160) from  
609 the cluster analysis, classified into either cluster 1 (magenta open circle; n=42) or cluster 2  
610 (green crosses; n=118) for each *Iba1+* related variable, plotted as a function of *GAD67+* soma  
611 diameter: (A) Percentage *Iba1+* coverage of *GAD67+* soma; (B) normalized total  $\mu\text{m}$  *Iba1+*  
612 coverage of *GAD67+* soma; (C) number of *Iba1+* cells abutting *GAD67+* soma; (D) number of  
613 *Iba1+* processes abutting *GAD67+* soma. (E) ROC analyses showing classifier performance of  
614 each variable in discriminating *GAD67+* cells into cluster 1 or cluster 2. Normalized total  $\mu\text{m}$   
615 *Iba1+* coverage of *GAD67+* soma could perfectly classify *GAD67+* cells using a cut-off value  
616 of 0.28.

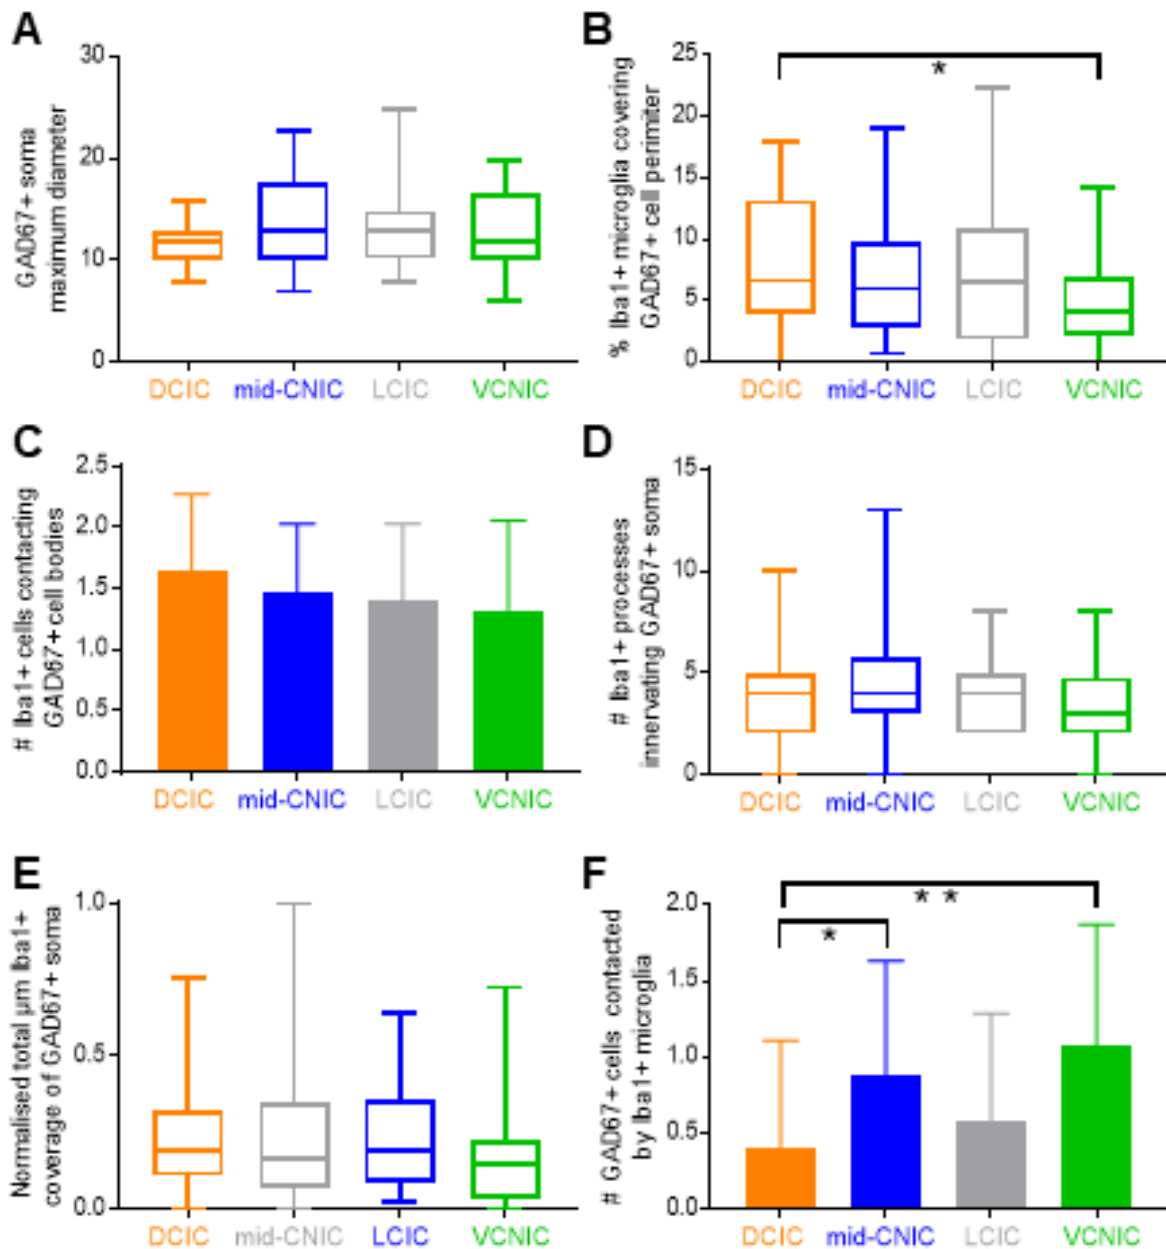

617

618 **Figure 8.** No clear relationship between measured variables and IC sub-region. (A) *GAD67+*  
619 soma diameter was similar across sub-regions of IC. (B) The percentage of *Iba1+* coverage of  
620 *GAD67+* somata was lower in VCNIC than the other three sub-regions. (C) The number of  
621 *Iba1+* cells contacting *GAD67+* somata, (D) the number of *Iba1+* processes abutting *GAD67+*  
622 somata, and (E) the normalized total  $\mu\text{m}$  of *Iba1+* coverage of *GAD67+* somata did not differ  
623 between sub-regions. (F) There were, on average, a greater number of *GAD67+* somata  
624 contacted by each *Iba1+* cell, owing to the greater density of *GAD67+* cells in VCNIC.

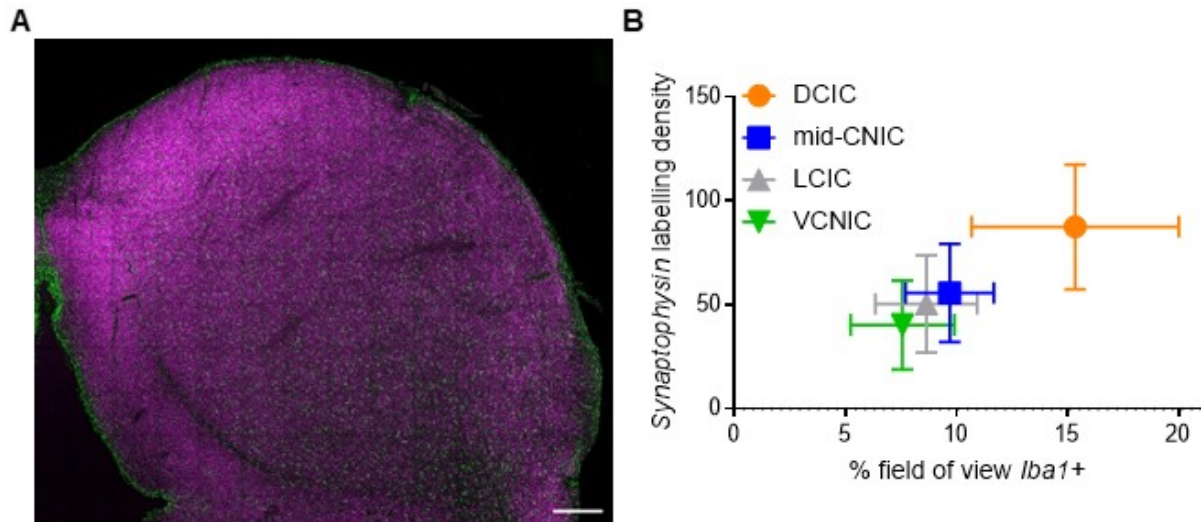

625

626 **Figure 9.** Presynaptic marker *synaptophysin* has greater density of labelling in DCIC and  
627 correlates with *Iba1* labelling. (A) Tiled confocal micrograph showing representative  
628 *synaptophysin* (magenta) and *Iba1* (green) labelling. Note the greater density of  
629 *synaptophysin* labelling in DCIC. Scale bar 400 $\mu$ m (B) Quantification from ROIs in sub-regions  
630 showing greater *synaptophysin* puncta density in DCIC which correlates with *Iba1* percentage  
631 field of view labelling.

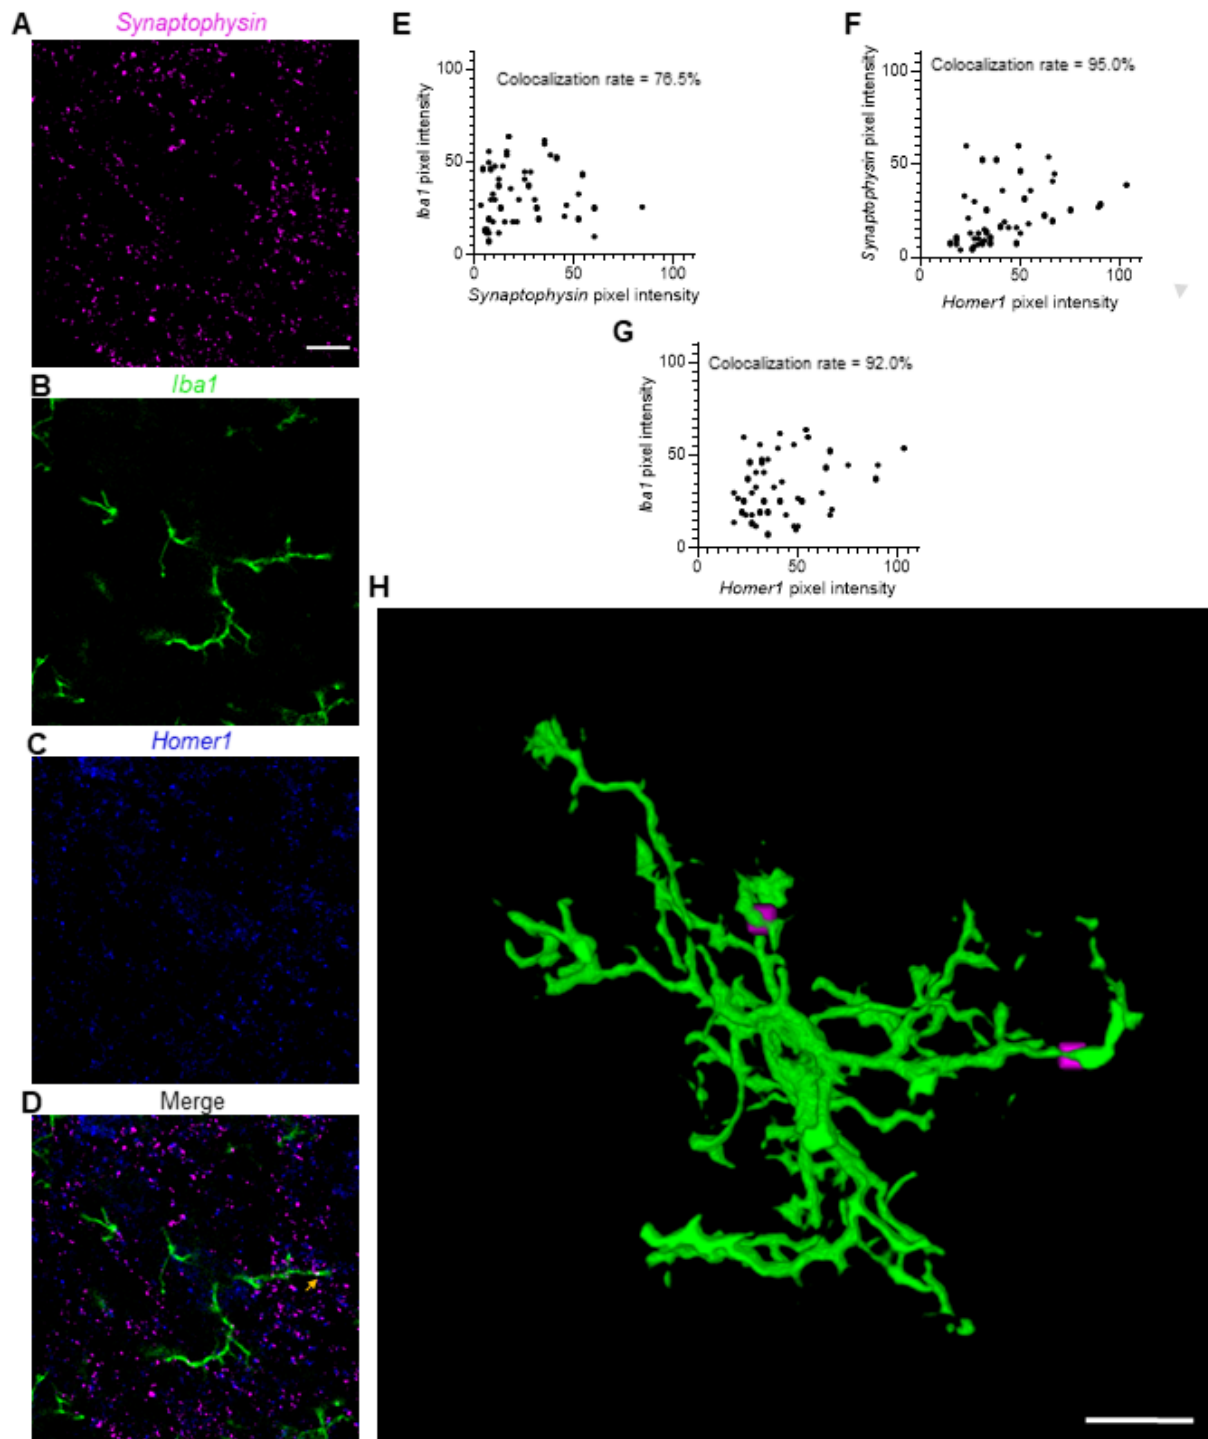

632

633 **Figure 10.** Colocalization of *synaptophysin* and *homer1* on 3D reconstructed *Iba1+* microglia.

634 Single plane confocal micrograph showing (A) *synaptophysin*, (B) *Iba1*, (C) *homer1* and (D)

635 merged image. Arrowhead shows point of colocalization of all three labels. All z-planes were

636 thresholded, binarized and pixels containing positive labelling for all three channels were

637 quantified. Scale bar 10 $\mu$ m. ROI analysis of points of colocalization showing pixel intensity for

638 (E) *synaptophysin* and *Iba1*, (F) *synaptophysin* and *homer1* and (G) *Iba1* and *homer1*. All

639 combinations showed high rates of colocalization within ROI. (H) 3D reconstruction of *Iba1+*



640 microglial cell in VCNIC (green, as in B) showing two points of *synaptophysin+* and *homer1+*  
641 colocalization (magenta; as in A and C, respectively). Green signal to scale in (D) 10 $\mu$ m,  
642 magenta points of colocalization have been made 13-fold larger for clarity.

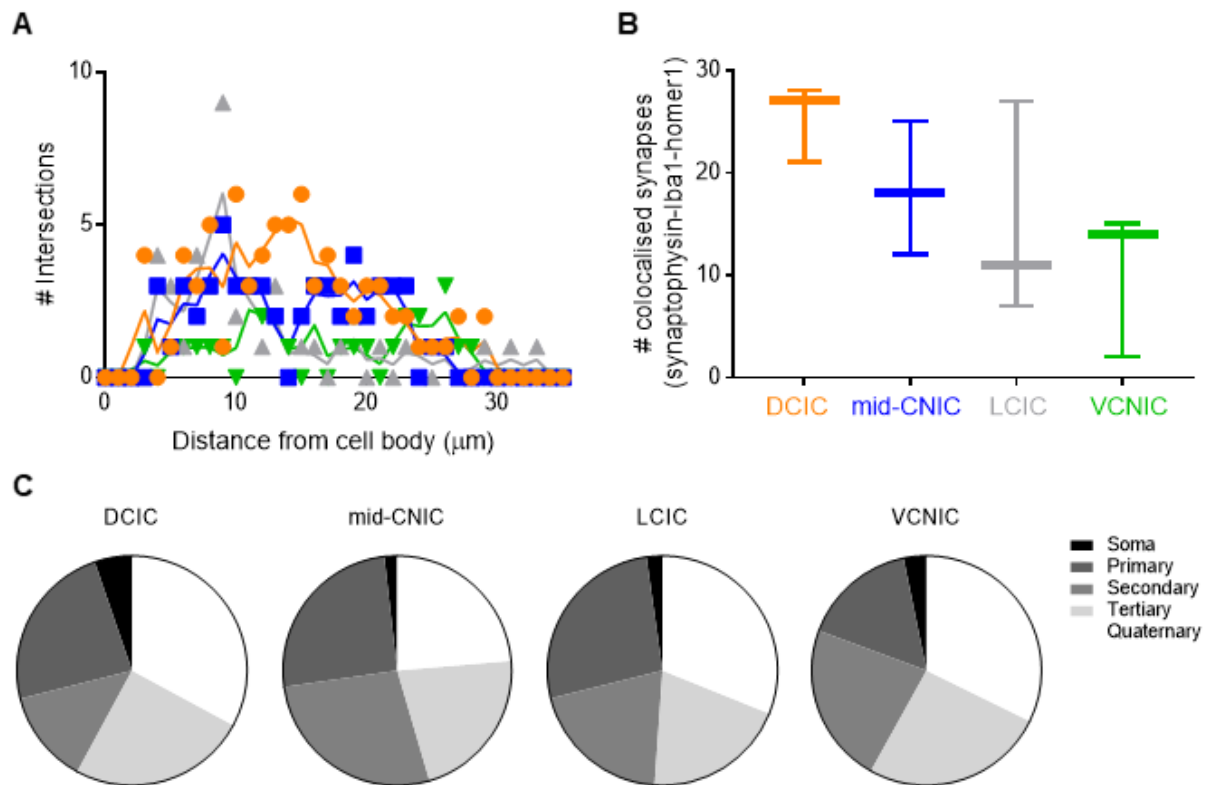

643

644 **Figure 11.** *Iba1* colocalizes at *synaptophysin+* and *homer1+* puncta in greater numbers in  
645 DCIC. (A) 3D volume Sholl analysis (plotted in 2D) showing colocalization of *synaptophysin+*  
646 and *homer1+* puncta on *Iba1+* microglia (n=3 per sub-region, colour-coded as in B). LOWESS  
647 regressions highlight greater values in DCIC. (B) Number of colocalized puncta per microglia.  
648 The DCIC had a greater number of puncta per microglia. (E) Analyses of puncta location on  
649 *Iba1+* branched ramifications show few puncta are located on somata and similar proportions  
650 are found on primary, secondary, tertiary and quaternary branches across sub-regions.

| Sub-region | Soma       | Primary      | Secondary    | Tertiary     | Quaternary   |
|------------|------------|--------------|--------------|--------------|--------------|
| DCIC       | 4<br>(5.3) | 18<br>(23.7) | 10<br>(13.2) | 19<br>(25)   | 25<br>(32.9) |
| mid-CNIC   | 1<br>(1.8) | 14<br>(25.5) | 15<br>(27.3) | 12<br>(21.8) | 13<br>(23.6) |
| LCIC       | 1<br>(2.2) | 12<br>(26.7) | 9<br>(20)    | 9<br>(20)    | 14<br>(31.1) |
| VCNIC      | 1<br>(3.2) | 5<br>(16.1)  | 7<br>(22.6)  | 8<br>(25.8)  | 10<br>(32.2) |

651

652 **Table 1.** Absolute numbers (and % of the total for that sub-region) of colocalized puncta  
653 positive for *synaptophysin*, *Iba1* and *homer1*, as shown in Figure 11C. Note similar proportions  
654 of puncta both within and between sub-regions.

## 655 **References**

- 656 Abràmoff MD, Magalhães PJ, Ram SJ (2004) Image processing with ImageJ. *Biophotonics*  
657 *International* 11:36-42.
- 658 Aitkin LM, Dickhaus H, Schult W, Zimmermann M (1978) External nucleus of inferior colliculus  
659 - auditory and spinal somatosensory afferents and their interactions. *Journal of*  
660 *Neurophysiology* 41:837-847.
- 661 Ayala Y, Malmierca M (2013) Stimulus-specific adaptation and deviance detection in the  
662 inferior colliculus. *Frontiers in Neural Circuits* 6:89.
- 663 Bajo VM, Moore DR (2005) Descending projections from the auditory cortex to the inferior  
664 colliculus in the gerbil, *Meriones unguiculatus*. *Journal of Comparative Neurology*  
665 486:101-116.
- 666 Bajo VM, Nodal FR, Moore DR, King AJ (2010) The descending corticocollicular pathway  
667 mediates learning-induced auditory plasticity. *Nature Neuroscience* 13:253-260.
- 668 Bajo VM, Nodal FR, Bizley JK, Moore DR, King AJ (2006) The ferret auditory cortex: descending  
669 projections to the inferior colliculus. *Cerebral Cortex* 17:475-491.
- 670 Baumann S, Griffiths TD, Sun L, Petkov CI, Thiele A, Rees A (2011) Orthogonal representation  
671 of sound dimensions in the primate midbrain. *Nature Neuroscience* 14:423-425.
- 672 Beebe NL, Young JW, Mellott JG, Schofield BR (2016) Extracellular molecular markers and soma  
673 size of inhibitory neurons: evidence for four subtypes of GABAergic cells in the inferior  
674 colliculus. *Journal of Neuroscience* 36:3988-3999.
- 675 Brakeman PR, Lanahan AA, O'Brien R, Roche K, Barnes CA, Huganir RL, Worley PF (1997)  
676 Homer: A protein that selectively binds metabotropic glutamate receptors. *Nature*  
677 386:284-288.
- 678 Bulloch K, Miller MM, Gal-Toth J, Milner TA, Gottfried-Blackmore A, Waters EM, Kaunzner UW,  
679 Liu K, Lindquist R, Nussenzweig MC, Steinman RM, McEwen BS (2008) CD11c/EYFP  
680 transgene illuminates a discrete network of dendritic cells within the embryonic,  
681 neonatal, adult, and injured mouse brain. *Journal of Comparative Neurology* 508:687-  
682 710.

683 Buscemi L, Ginet V, Lopatar J, Montana V, Pucci L, Spagnuolo P, Zehnder T, Grubišić V, Truttman  
684 A, Sala C, Hirt L, Parpura V, Puyal J, Bezzi P (2017) Homer1 scaffold proteins govern  
685 Ca<sup>2+</sup> dynamics in normal and reactive astrocytes. *Cerebral Cortex* 27:2365-2384.

686 Ciruela F, Soloviev MM, Chan WY, McIlhinney RA (2000) Homer-1c/Vesl-1L modulates the cell  
687 surface targeting of metabotropic glutamate receptor type 1alpha: evidence for an  
688 anchoring function. *Molecular and Cellular Neuroscience* 15:36-50.

689 Clifton NE, Cameron D, Trent S, Sykes LH, Thomas KL, Hall J (2017) Hippocampal regulation of  
690 postsynaptic density homer1 by associative learning. *Neural Plasticity* 2017:11.

691 Coote EJ, Rees A (2008) The distribution of nitric oxide synthase in the inferior colliculus of  
692 guinea pig. *Neuroscience* 154:218-225.

693 De Martino F, Moerel M, van de Moortele PF, Ugurbil K, Goebel R, Yacoub E, Formisano E  
694 (2013) Spatial organization of frequency preference and selectivity in the human  
695 inferior colliculus. *Nature Communications* 4:1386.

696 Debus E, Weber K, Osborn M (1983) Monoclonal-antibodies specific for glial fibrillary acidic  
697 (GFA) protein and for each of the neurofilament triplet polypeptides. *Differentiation*  
698 25:193-203.

699 Engle JR, Gray DT, Turner H, Udell JB, Recanzone GH (2014) Age-related neurochemical  
700 changes in the rhesus macaque inferior colliculus. *Frontiers in Aging Neuroscience* 6:73.

701 Faye-Lund H, Osen KK (1985) Anatomy of the inferior colliculus in rat. *Anatomy and*  
702 *Embryology* 171:1-20.

703 Feliciano M, Potashner SJ (1995) Evidence for a glutamatergic pathway from the guinea-pig  
704 auditory-cortex to the inferior colliculus. *Journal of Neurochemistry* 65:1348-1357.

705 Fong AY, Stornetta RL, Foley CM, Potts JT (2005) Immunohistochemical localization of GAD67-  
706 expressing neurons and processes in the rat brainstem: subregional distribution in the  
707 nucleus tractus solitarius. *Journal of Comparative Neurology* 493:274-290.

708 Foster NL, Mellott JG, Schofield BR (2014) Perineuronal nets and GABAergic cells in the inferior  
709 colliculus of guinea pigs. *Frontiers in Neuroanatomy* 7:53.

710 Freund TF, Buzsaki G (1996) Interneurons of the hippocampus. *Hippocampus* 6:347-470.

711 Fuentes-Santamaría V, Alvarado JC, Juiz JM (2012) Long-term interaction between microglial  
712 cells and cochlear nucleus neurons after bilateral cochlear ablation. *Journal of*  
713 *Comparative Neurology* 520:2974-2990.

- 714 Games KD, Winer JA (1988) Layer V in rat auditory: cortex projections to the inferior colliculus  
715 and contralateral cortex. *Hearing Research* 34:1-26.
- 716 Gavrilovici C, D'Alfonso S, Poulter MO (2010) Diverse interneuron populations have highly  
717 specific interconnectivity in the rat piriform cortex. *Journal of Comparative Neurology*  
718 518:1570-1588.
- 719 Geis HRAP, Borst JGG (2013) Intracellular responses to frequency modulated tones in the  
720 dorsal cortex of the mouse inferior colliculus. *Frontiers in Neural Circuits* 7:7.
- 721 Ghirardini E, Wadle SL, Augustin V, Becker J, Brill S, Hammerich J, Seifert G, Stephan J (2018)  
722 Expression of functional inhibitory neurotransmitter transporters GlyT1, GAT-1, and  
723 GAT-3 by astrocytes of inferior colliculus and hippocampus. *Molecular Brain* 11:4.
- 724 Gimse K, Gorzek RC, Olin A, Osting S, Burger C (2018) Hippocampal Homer1b/c is necessary  
725 for contextual fear conditioning and group I metabotropic glutamate receptor  
726 mediated long-term depression. *Neurobiology of Learning and Memory* 156:17-23.
- 727 Gleich O, Netz J, Strutz J (2014) Comparing the inferior colliculus of young and old gerbils  
728 (*Meriones unguiculatus*) with an emphasis on GABA. *Experimental Gerontology* 57:155-  
729 162.
- 730 Glueckert R, Bitsche M, Miller JM, Zhu YY, Prieskorn DM, Altschuler RA, Schrott-Fischer A (2008)  
731 Deafferentation-associated changes in afferent and efferent processes in the guinea  
732 pig cochlea and afferent regeneration with chronic intrascalar brain-derived  
733 neurotrophic factor and acidic fibroblast growth factor. *Journal of Comparative*  
734 *Neurology* 507:1602-1621.
- 735 Goodings L, He J, Wood AJ, Harris WA, Currie PD, Jusuf PR (2017) In vivo expression of  
736 Nurr1/Nr4a2a in developing retinal amacrine subtypes in zebrafish Tg(nr4a2a:eGFP)  
737 transgenics. *Journal of Comparative Neurology* 525:1962-1979.
- 738 Hayashi Y, Ishibashi H, Hashimoto K, Nakanishi H (2006) Potentiation of the NMDA receptor-  
739 mediated responses through the activation of the glycine site by microglia secreting  
740 soluble factors. *Glia* 53:660-668.
- 741 Helfer JL, Goodlett CR, Greenough WT, Klintsova AY (2009) The effects of exercise on  
742 adolescent hippocampal neurogenesis in a rat model of binge alcohol exposure during  
743 the brain growth spurt. *Brain Research* 1294:1-11.

- 744 Herbert H, Aschoff A, Ostwald J (1991) Topography of projections from the auditory cortex to  
745 the inferior colliculus in the rat. *Journal of Comparative Neurology* 304:103-122.
- 746 Hill RA, Grutzendler J (2014) In vivo imaging of oligodendrocytes with sulforhodamine 101.  
747 *Nature Methods* 11:1081-1082.
- 748 Huynh DP, Figueroa K, Hoang N, Pulst SM (2000) Nuclear localization or inclusion body  
749 formation of ataxin-2 are not necessary for SCA2 pathogenesis in mouse or human.  
750 *Nature Genetics* 26:44-50.
- 751 Imai Y, Ibata I, Ito D, Ohsawa K, Kohsaka S (1996) A novel gene *iba1* in the major  
752 histocompatibility complex class III region encoding an EF hand protein expressed in a  
753 monocytic lineage. *Biochemical and Biophysical Research Communications* 224:855-  
754 862.
- 755 Ito T, Bishop DC, Oliver DL (2009) Two classes of GABAergic neurons in the inferior colliculus.  
756 *Journal of Neuroscience* 29:13860-13869.
- 757 Jaafari N, Khomitch-Baud A, Gilhodes JC, Hua G, Julé Y (2008) Qualitative and quantitative  
758 analysis of tachykinin NK2 receptors in chemically defined human colonic neuronal  
759 pathways. *Journal of Comparative Neurology* 507:1542-1558.
- 760 Kaas JH, Hackett TA (1999) 'What' and 'where' processing in auditory cortex. *Nature*  
761 *Neuroscience* 2:1045-1047.
- 762 Keating P, Dahmen JC, King AJ (2013) Context-specific reweighting of auditory spatial cues  
763 following altered experience during development. *Current Biology* 23:1291-1299.
- 764 Kelleher MA, Hirst JJ, Palliser HK (2013) Changes in neuroactive steroid concentrations after  
765 preterm delivery in the guinea pig. *Reproductive Sciences* 20:1365-1375.
- 766 Kelleher MA, Palliser HK, Walker DW, Hirst JJ (2011) Sex-dependent effect of a low neurosteroid  
767 environment and intrauterine growth restriction on foetal guinea pig brain  
768 development. *Journal of Endocrinology* 208:301-309.
- 769 Knabe W, Washausen S, Happel N, Kuhn HJ (2008) Diversity in mammalian chiasmatic  
770 architecture: ipsilateral axons are deflected at glial arches in the prechiasmatic optic  
771 nerve of the eutherian *Tupaia belangeri*. *Journal of Comparative Neurology* 508:437-  
772 457.
- 773 Komitova M, Zhao LR, Gidö G, Johansson BB, Eriksson P (2005) Postischemic exercise  
774 attenuates whereas enriched environment has certain enhancing effects on lesion-

- 775 induced subventricular zone activation in the adult rat. *European Journal of*  
776 *Neuroscience* 21:2397-2405.
- 777 Kotani T, Murata Y, Ohnishi H, Mori M, Kusakari S, Saito Y, Okazawa H, Bixby JL, Matozaki T  
778 (2010) Expression of PTPRO in the interneurons of adult mouse olfactory bulb. *Journal*  
779 *of Comparative Neurology* 518:119-136.
- 780 Kotti TJ, Ramirez DMO, Pfeiffer BE, Huber KM, Russell DW (2006) Brain cholesterol turnover  
781 required for geranylgeraniol production and learning in mice. *Proceedings of the*  
782 *National Academy of Sciences of the United States of America* 103:3869-3874.
- 783 Kumpik DP, King AJ (2019) A review of the effects of unilateral hearing loss on spatial hearing.  
784 *Hearing Research* 372:17-28.
- 785 Latov N, Nilaver G, Zimmerman EA, Johnson WG, Silverman AJ, Defendini R, Cote L (1979)  
786 Fibrillary astrocytes proliferate in response to brain injury - study combining  
787 immunoperoxidase technique for glial fibrillary acidic protein and autoradiography of  
788 tritiated-thymidine. *Developmental Biology* 72:381-384.
- 789 Lawson LJ, Perry VH, Dri P, Gordon S (1990) Heterogeneity in the distribution and morphology  
790 of microglia in the normal adult-mouse brain. *Neuroscience* 39:151-170.
- 791 Lee JE, Ahn CH, Lee JY, Chung ES, Jeon CJ (2004) Nitric oxide synthase and calcium-binding  
792 protein-containing neurons in the hamster visual cortex. *Molecules and Cells* 18:30-39.
- 793 Lee KS, Vandemark K, Mezey D, Shultz N, Fitzpatrick D (2019) Functional synaptic architecture  
794 of callosal inputs in mouse primary visual cortex. *Neuron* 101:421-428 e425.
- 795 Lennerz JK, Rühle V, Ceppa EP, Neuhuber WL, Bunnett NW, Grady EF, Messlinger K (2008)  
796 Calcitonin receptor-like receptor (CLR), receptor activity-modifying protein 1 (RAMP1),  
797 and calcitonin gene-related peptide (CGRP) immunoreactivity in the rat  
798 trigeminovascular system: Differences between peripheral and central CGRP receptor  
799 distribution. *Journal of Comparative Neurology* 507:1277-1299.
- 800 Liu S, Gao X, Gao N, Wang X, Fang X, Hu HZ, Wang GD, Xia Y, Wood JD (2005) Expression of  
801 type 1 corticotropin-releasing factor receptor in the guinea pig enteric nervous system.  
802 *Journal of Comparative Neurology* 481:284-298.
- 803 Lorenz B, Garcia-Segura LM, DonCarlos LL (2005) Cellular phenotype of androgen receptor-  
804 immunoreactive nuclei in the developing and adult rat brain. *Journal of Comparative*  
805 *Neurology* 492:456-468.



- 806 Malmierca MS, Hackett TA (2010) Structural organization of the ascending auditory pathway.  
807 NewYork, NY: Oxford University Press.
- 808 Merchán M, Aguilar LA, Lopez-Poveda EA, Malmierca MS (2005) The inferior colliculus of the  
809 rat: quantitative immunocytochemical study of GABA and glycine. *Neuroscience*  
810 136:907-925.
- 811 Mouriec K, Balthazart J (2013) Peripubertal proliferation of progenitor cells in the preoptic area  
812 of Japanese quail (*Coturnix japonica*). *Brain Research* 1516:20-32.
- 813 Nakamoto KT, Sowick CS, Schofield BR (2013) Auditory cortical axons contact commissural  
814 cells throughout the guinea pig inferior colliculus. *Hearing Research* 306:131-144.
- 815 Olah M, Biber K, Vinet J, Boddeke HWGM (2011) Microglia phenotype diversity. *Cns &*  
816 *Neurological Disorders-Drug Targets* 10:108-118.
- 817 Oliver DL, Winer JA, Beckius GE, Saintmarie RL (1994) Morphology of GABAergic neurons in  
818 the inferior colliculus of the cat. *Journal of Comparative Neurology* 340:27-42.
- 819 Olthof BMJ, Gartside SE, Rees A (2019) Puncta of neuronal nitric oxide synthase (nNOS)  
820 mediate NMDA receptor signaling in the auditory midbrain. *Journal of Neuroscience*  
821 39:876-887.
- 822 Ono M, Yanagawa Y, Koyano K (2005) GABAergic neurons in inferior colliculus of the GAD67-  
823 GFP knock-in mouse: electrophysiological and morphological properties. *Neuroscience*  
824 *Research* 51:475-492.
- 825 Orton LD, Pappasavas CA, Rees A (2016) Commissural gain control enhances the midbrain  
826 representation of sound location. *Journal of Neuroscience* 36:4470-4481.
- 827 Ouda L, Syka J (2012) Immunocytochemical profiles of inferior colliculus neurons in the rat and  
828 their changes with aging. *Frontiers in Neural Circuits* 6:68.
- 829 Ouda L, Burianova J, Syka J (2012) Age-related changes in calbindin and calretinin  
830 immunoreactivity in the central auditory system of the rat. *Experimental Gerontology*  
831 47:497-506.
- 832 Parks XX, Contini D, Jordan PM, Holt JC (2017) Confirming a role for alpha 9nAChRs and SK  
833 potassium channels in type II hair cells of the turtle posterior crista. *Frontiers in Cellular*  
834 *Neuroscience* 11:356.
- 835 Pocock JM, Kettenmann H (2007) Neurotransmitter receptors on microglia. *Trends in*  
836 *neurosciences* 30:527-535.

- 837 Ramirez DMO, Andersson S, Russell DW (2008) Neuronal expression and subcellular  
838 localization of cholesterol 24-hydroxylase in the mouse brain. *Journal of Comparative*  
839 *Neurology* 507:1676-1693.
- 840 Reichenbach N, Delekate A, Breithausen B, Keppler K, Poll S, Schulte T, Peter J, Plescher M,  
841 Hansen JN, Blank N, Keller A, Fuhrmann M, Henneberger C, Halle A, Petzold GC (2018)  
842 P2Y1 receptor blockade normalizes network dysfunction and cognition in an  
843 Alzheimer's disease model. *Journal of Experimental Medicine* 215:1649-1663.
- 844 Riazi K, Galic MA, Kentner AC, Reid AY, Sharkey KA, Pittman QJ (2015) Microglia-dependent  
845 alteration of glutamatergic synaptic transmission and plasticity in the hippocampus  
846 during peripheral inflammation. *Journal of Neuroscience* 35:4942-4952.
- 847 Roberts RC, Ribak CE (1987a) GABAergic neurons and axon terminals in the brainstem auditory  
848 nuclei of the gerbil. *Journal of Comparative Neurology* 258:267-280.
- 849 Roberts RC, Ribak CE (1987b) An electron microscopic study of GABAergic neurons and  
850 terminals in the central nucleus of the inferior colliculus of the rat. *Journal of*  
851 *neurocytology* 16:333-345.
- 852 Rosen RF, Farberg AS, Gearing M, Dooyema J, Long PM, Anderson DC, Davis-Turak J, Coppola  
853 G, Geschwind DH, Paré JF, Duong TQ, Hopkins WD, Preuss TM, Walker LC (2008)  
854 Tauopathy with paired helical filaments in an aged chimpanzee. *Journal of Comparative*  
855 *Neurology* 509:259-270.
- 856 Sala C, Piëch V, Wilson NR, Passafaro M, Liu G, Sheng M (2001) Regulation of dendritic spine  
857 morphology and synaptic function by Shank and Homer. *Neuron* 31:115-130.
- 858 Sanchez PE, Navarro FP, Fares RP, Nadam J, Georges B, Moulin C, Le Cavorsin M, Bonnet C,  
859 Ryvlin P, Belmeguenai A, Bodennec J, Morales A, Bezin L (2009) Erythropoietin receptor  
860 expression is concordant with erythropoietin but not with common beta chain  
861 expression in the rat brain throughout the life span. *Journal of Comparative Neurology*  
862 514:403-414.
- 863 Schafer DP, Lehrman EK, Kautzman AG, Koyama R, Mardinly AR, Yamasaki R, Ransohoff RM,  
864 Greenberg ME, Barres BA, Stevens B (2012) Microglia sculpt postnatal neural circuits in  
865 an activity and complement-dependent manner. *Neuron* 74:691-705.
- 866 Schofield BR (2010) *Structural organization of the descending auditory pathway*. New York,  
867 NY: Oxford University Press.

- 868 Schonbrunn A (2014) Editorial: antibody can get it right: confronting problems of antibody  
869 specificity and irreproducibility. *Molecular Endocrinology* 28:1403-1407.
- 870 Sokoloff L, Reivich M, Kennedy C, Des Rosiers MH, Patlak CS, Pettigrew KD, Sakurada O,  
871 Shinohara M (1977) The [<sup>14</sup>C] deoxyglucose method for the measurement of local  
872 cerebral glucose utilization: theory, procedure, and normal values in the conscious and  
873 anesthetized albino rat. *Journal of Neurochemistry* 28:897-916.
- 874 Soloviev MM, Ciruela F, Chan WY, McIlhinney RAJ (2000) Mouse brain and muscle tissues  
875 constitutively express high levels of Homer proteins. *European Journal of Biochemistry*  
876 267:634-639.
- 877 Stanton GB, Kohler SJ, Boklweski J, Cameron JL, Greenough WT (2015) Cytogenesis in the adult  
878 monkey motor cortex: perivascular NG2 cells are the major adult born cell type. *Journal*  
879 *of Comparative Neurology* 523:849-868.
- 880 Su JM, Gorse K, Ramirez F, Fox MA (2010) Collagen XIX is expressed by interneurons and  
881 contributes to the formation of hippocampal synapses. *Journal of Comparative*  
882 *Neurology* 518:229-253.
- 883 Sweet RA, Dorph-Petersen KA, Lewis DA (2005) Mapping auditory core, lateral belt, and  
884 parabelt cortices in the human superior temporal gyrus. *Journal of Comparative*  
885 *Neurology* 491:270-289.
- 886 Syka J, Popelář J, Kvašňák E, Astl J (2000) Response properties of neurons in the central nucleus  
887 and external and dorsal cortices of the inferior colliculus in guinea pig. *Experimental*  
888 *Brain Research* 133:254-266.
- 889 Toro CT, Hallak JEC, Dunham JS, Deakin JFW (2006) Glial fibrillary acidic protein and glutamine  
890 synthetase in subregions of prefrontal cortex in schizophrenia and mood disorder.  
891 *Neuroscience Letters* 404:276-281.
- 892 Trapp BD, Wujek JR, Criste GA, Jalabi W, Yin X, Kidd GJ, Stohlman S, Ransohoff R (2007)  
893 Evidence for synaptic stripping by cortical microglia. *Glia* 55:360-368.
- 894 Tremblay MÈ, Lowery RL, Majewska AK (2010) Microglial interactions with synapses are  
895 modulated by visual experience. *Plos Biology* 8:e1000527.
- 896 Tremblay R, Lee S, Rudy B (2016) GABAergic interneurons in the neocortex: from cellular  
897 properties to circuits. *Neuron* 91:260-292.

- 898 Tsuda M, Tozaki-Saitoh H, Inoue K (2010) Pain and purinergic signaling. *Brain Research*  
899 *Reviews* 63:222-232.
- 900 Voitenko LP, Marlinsky VV (1993) Stereotaxic atlas of the guinea pig brainstem.  
901 *Neurophysiology* 25:52-77.
- 902 Voskuil JL (2017) The challenges with the validation of research antibodies. *F1000Research*  
903 6:161.
- 904 Wagner KV, Häusl AS, Pöhlmann ML, Hartmann J, Labermaier C, Müller MB, Schmidt MV (2014)  
905 Hippocampal Homer1 levels influence motivational behavior in an operant  
906 conditioning task. *Plos One* 9:e.85975.
- 907 Wake H, Moorhouse AJ, Jinno S, Kohsaka S, Nabekura J (2009) Resting microglia directly  
908 monitor the functional state of synapses in vivo and determine the fate of ischemic  
909 terminals. *Journal of Neuroscience* 29:3974-3980.
- 910 Watson RE, Wiegand SJ, Clough RW, Hoffman GE (1986) Use of cryoprotectant to maintain  
911 long-term peptide immunoreactivity and tissue morphology. *Peptides* 7:155-159.
- 912 Wiedenmann B, Franke WW (1985) Identification and localization of synaptophysin, an integral  
913 membrane glycoprotein of Mr 38,000 characteristic of presynaptic vesicles. *Cell*  
914 41:1017-1028.
- 915 Willis CL, Leach L, Clarke GJ, Nolan CC, Ray DE (2004) Reversible disruption of tight junction  
916 complexes in the rat blood-brain barrier, following transitory focal astrocyte loss. *Glia*  
917 48:1-13.
- 918 Willis CL, Nolan CC, Reith SN, Lister T, Prior MJ, Guerin CJ, Mavroudis G, Ray DE (2003) Focal  
919 astrocyte loss is followed by microvascular damage, with subsequent repair of the  
920 blood-brain barrier in the apparent absence of direct astrocytic contact. *Glia* 45:325-  
921 337.
- 922 Winer JA, Prieto JJ (2001) Layer V in cat primary auditory cortex (AI): Cellular architecture and  
923 identification of projection neurons. *Journal of Comparative Neurology* 434:379-412.
- 924 Winer JA, Larue DT, Diehl JJ, Hefti BJ (1998) Auditory cortical projections to the cat inferior  
925 colliculus. *Journal of Comparative Neurology* 400:147-174.
- 926 Yanpallewar SU, Fernandes K, Marathe SV, Vadodaria KC, Jhaveri D, Rommelfanger K, Ladiwala  
927 U, Jha S, Muthig V, Hein L, Bartlett P, Weinshenker D, Vaidya VA (2010) alpha(2)-

928 Adrenoceptor blockade accelerates the neurogenic, neurotrophic, and behavioral  
929 effects of chronic antidepressant treatment. *Journal of Neuroscience* 30:1096-1109.

930 Yu CX, Derdikman D, Haidarliu S, Ahissar E (2006) Parallel thalamic pathways for whisking and  
931 touch signals in the rat. *Plos Biology* 4:e124.

932 Zelano J, Berg A, Thams S, Hailer NP, Cullheim S (2009) SynCAM1 expression correlates with  
933 restoration of central synapses on spinal motoneurons after two different models of  
934 peripheral nerve injury. *Journal of Comparative Neurology* 517:670-682.

935 Zettel ML, Frisina RD, Haider SE, O'Neill WE (1997) Age-related changes in calbindin D-28k and  
936 calretinin immunoreactivity in the inferior colliculus of CBA/CaJ and C57Bl/6 mice.  
937 *Journal of Comparative Neurology* 386:92-110.

938 Zhang J, Malik A, Choi HB, Ko RW, Dissing-Olesen L, MacVicar BA (2014) Microglial CR3  
939 activation triggers long-term synaptic depression in the hippocampus via NADPH  
940 oxidase. *Neuron* 82:195-207.

941
